# Supplementary material for: Predicting nearest neighbor free energies of modified RNA with LIE: results for pseudouridine and N1-methylpseudouridine within RNA duplexes
Source: Royal Society of Chemistry journal article supplement (doi:10.1039/d3cp02442c), 2023-11-24
Supplement: d3cp02442c1.pdf [file d3cp02442c1.pdf]

# Supporting information

## Predicting nearest neighbor free energies of modified RNA with LIE: Results for pseudouridine and N1-methylpseudouridine within RNA duplexes

Nivedita Dutta,<sup>†</sup> Joanna Sarzynska,<sup>‡</sup> Indrajit Deb,<sup>†</sup> Ansuman Lahiri<sup>\*,†</sup>

### Author Affiliations

<sup>†</sup>Department of Biophysics, Molecular Biology and Bioinformatics, University of Calcutta, 92, Acharya Prafulla Chandra Road, Kolkata 700009, West Bengal, India

<sup>‡</sup>Institute of Bioorganic Chemistry, Polish Academy of Sciences, Noskowskiego 12/14, 61-704 Poznan, Poland

### \*Correspondence to

Ansuman Lahiri (Email [albmbg@caluniv.ac.in](mailto:albmbg@caluniv.ac.in))

ORCID of the authors: Nivedita Dutta (0000-0002-8371-9007), Indrajit Deb (0000-0002-2722-582X) Joanna Sarzynska (0000-0002-0500-2238), Ansuman Lahiri (0000-0002-7398-4114)

## Methods

### Molecular dynamics simulations

In the present work for each of the duplexes 15-18 (Table S1), the centroid structure from the most populated cluster obtained from the last 400 ns of the 500 ns simulations at 300K (detailed protocol in Dutta et al., 2023<sup>1</sup>), was further subjected to an additional set of minimization, heating, equilibration and production run steps.

The conditions were the same as mentioned in Dutta et al., 2023<sup>1</sup> except that the heating was carried out from 0K to 310K and the equilibration and production runs were performed at 310K. The production run was carried out for 50 ns and the trajectory corresponding to the last 40 ns simulation was utilized for the analysis of stacking and base pairing energies and calculation of a set of nearest neighbor thermodynamic parameters (at 310K). The MD simulations were performed using the AMBER18 software package using the GPU version of the *pmemd* module.

### Analyses

The hydrogen bonding energies and the base stacking energies were calculated following the same method as mentioned in the main text

**Table S1.** List of the RNA duplexes considered in this work.

| Description                                                                     | SI No. | Sequences                          |
|---------------------------------------------------------------------------------|--------|------------------------------------|
| unmodified duplexes<br>(containing U(5)-X(14)<br>base pair where<br>X=>A/G/U/C) | 1      | 5'-UCAGUCAGU-3'<br>3'-AGUCAGUCA-5' |
|                                                                                 | 2      | 5'-UCACUGAGU-3'<br>3'-AGUGACUCA-5' |
|                                                                                 | 3      | 5'-UCAUUAAGU-3'<br>3'-AGUAAUUCA-5' |

|                                                                                 |                                                                              |                                                      |
|---------------------------------------------------------------------------------|------------------------------------------------------------------------------|------------------------------------------------------|
|                                                                                 | 4                                                                            | 5'-UCA <b>A</b> UUAGU-3'<br>3'-AGU <b>U</b> AAUCA-5' |
|                                                                                 | 5                                                                            | 5'-UCAG <b>U</b> CAGU-3'<br>3'-AGUC <b>G</b> GUCA-5' |
|                                                                                 | 6                                                                            | 5'-UCAG <b>U</b> CAGU-3'<br>3'-AGUC <b>U</b> GUCA-5' |
|                                                                                 | 7                                                                            | 5'-UCAG <b>U</b> CAGU-3'<br>3'-AGUC <b>C</b> GUCA-5' |
| Ψ-modified duplexes<br>(containing Ψ(5)-X(14)<br>base pair where<br>X=>A/G/U/C) | 8                                                                            | 5'-UCAG <b>Ψ</b> CAGU-3'<br>3'-AGUC <b>A</b> GUCA-5' |
|                                                                                 | 9                                                                            | 5'-UCAC <b>Ψ</b> GAGU-3'<br>3'-AGUG <b>A</b> CUCA-5' |
|                                                                                 | 10                                                                           | 5'-UCA <b>U</b> ΨAAGU-3'<br>3'-AGU <b>A</b> AUUCA-5' |
|                                                                                 | 11                                                                           | 5'-UCA <b>A</b> ΨUAGU-3'<br>3'-AGU <b>U</b> AAUCA-5' |
|                                                                                 | 12                                                                           | 5'-UCAG <b>Ψ</b> CAGU-3'<br>3'-AGUC <b>G</b> GUCA-5' |
|                                                                                 | 13                                                                           | 5'-UCAG <b>Ψ</b> CAGU-3'<br>3'-AGUC <b>U</b> GUCA-5' |
|                                                                                 | 14                                                                           | 5'-UCAG <b>Ψ</b> CAGU-3'<br>3'-AGUC <b>C</b> GUCA-5' |
|                                                                                 | m <sup>1</sup> Ψ-modified duplexes<br>(containing m <sup>1</sup> Ψ(5)-X(14)) | 15                                                   |

|                                |    |                                                   |
|--------------------------------|----|---------------------------------------------------|
| base pair where<br>X=>A/G/U/C) | 16 | 5'-UCACm <sup>1</sup> ΨGAGU-3'<br>3'-AGUGACUCA-5' |
|                                | 17 | 5'-UCAUm <sup>1</sup> ΨAAGU-3'<br>3'-AGUAAUUCA-5' |
|                                | 18 | 5'-UCAAm <sup>1</sup> ΨUAGU-3'<br>3'-AGUUAUCA-5'  |
|                                | 19 | 5'-UCAGm <sup>1</sup> ΨCAGU-3'<br>3'-AGUCGGUCA-5' |
|                                | 20 | 5'-UCAGm <sup>1</sup> ΨCAGU-3'<br>3'-AGUCUGUCA-5' |
|                                | 21 | 5'-UCAGm <sup>1</sup> ΨCAGU-3'<br>3'-AGUCCGUCA-5' |

**Table S2.** Interaction energies (kcal/mol) of the base-pair steps containing the m<sup>1</sup>Ψ-A base pair obtained from the last 400 ns of MD simulations at 300K for (A) duplex-Gm<sup>1</sup>ΨC, (B) duplex-Cm<sup>1</sup>ΨG, (C) duplex-Am<sup>1</sup>ΨU (D) duplex-Um<sup>1</sup>ΨA respectively.

| (A)                      | Y=m <sup>1</sup> Ψ <sup>a</sup> | Y=U <sup>b</sup> | Y=Ψ <sup>c</sup> |
|--------------------------|---------------------------------|------------------|------------------|
| <b>Stacking energies</b> |                                 |                  |                  |
| <b>Step 1</b>            | -15.98 (1.84)                   | -9.57 (2.6)      | -10.58 (2.51)    |
| 4 5                      | -15.95 (1.81)                   | -12.00           | -12.48           |
| 5'- G Y -3'              |                                 | -9.56            | -10.55           |
| 3'- C A -5'              |                                 | -9.59            | -10.58           |
| 15 14                    |                                 |                  |                  |
| <b>Step 2</b>            | -10.33 (3.21)                   | -9.45 (2.33)     | -9.84 (2.3)      |
| 5 6                      | -10.3 (1.71)                    | -12.66           | -11.99           |
| 5'- Y C -3'              |                                 | -9.44            | -9.82            |
| 3'- A G -5'              |                                 | -9.42            | -9.85            |
| 14 13                    |                                 |                  |                  |

| Base pairing energies                                                                                                                                                                                                                                                                                                                                                                                                                                                                                                                                                                                                                                                           |                                    |                                                 |                                                 |
|---------------------------------------------------------------------------------------------------------------------------------------------------------------------------------------------------------------------------------------------------------------------------------------------------------------------------------------------------------------------------------------------------------------------------------------------------------------------------------------------------------------------------------------------------------------------------------------------------------------------------------------------------------------------------------|------------------------------------|-------------------------------------------------|-------------------------------------------------|
| <b>4 15</b><br><b>G - C</b>                                                                                                                                                                                                                                                                                                                                                                                                                                                                                                                                                                                                                                                     | -26.09 (3.04)<br><br>-26.05 (3.08) | -26.0 (3.10)<br>-23.31<br><br>-26.0<br>-26.01   | -25.93 (3.10)<br>-23.18<br><br>-25.92<br>-25.95 |
| <b>5 14</b><br><b>Y - A</b>                                                                                                                                                                                                                                                                                                                                                                                                                                                                                                                                                                                                                                                     | -10.22 (2.76)<br><br>-10.53 (2.33) | -9.24 (2.48)<br>-12.66<br><br>-9.27<br>-9.22    | -8.99 (2.45)<br>-12.33<br><br>-8.96<br>-8.99    |
| <b>6 13</b><br><b>C - G</b>                                                                                                                                                                                                                                                                                                                                                                                                                                                                                                                                                                                                                                                     | -26.06 (3.08)<br><br>-26.06 (2.59) | -26.08 (3.03)<br>-24.02<br><br>-26.07<br>-26.07 | -26.10 (3.0)<br>-23.93<br><br>-26.08<br>-26.12  |
| <p><sup>a</sup> The values reported in Dutta et al., 2023 <sup>1</sup> from the last 400 ns of MD simulations (values from the second set of simulations are shown in purple).</p> <p><sup>b</sup> The values reported in Deb et al., 2019 <sup>2</sup> for U-A pair.</p> <p><sup>c</sup> The values reported in Deb et al., 2019 <sup>2</sup> for Ψ-A pair.</p> <p>The values corresponding to the QM energies reported in Deb et al., 2019 <sup>2</sup> are shown in blue.</p> <p>The values obtained from the first 200 ns (of the 400 ns trajectory) are shown in brown.</p> <p>The values obtained from the last 200 ns (of the 400 ns trajectory) are shown in green.</p> |                                    |                                                 |                                                 |

| (B)                                                             | Y=m <sup>1</sup> Ψ <sup>a</sup>    | Y=U <sup>b</sup>                             | Y=Ψ <sup>c</sup>                                |
|-----------------------------------------------------------------|------------------------------------|----------------------------------------------|-------------------------------------------------|
| <b>Stacking energies</b>                                        |                                    |                                              |                                                 |
| <b>Step 1</b><br><br>4 5<br>5'- C Y -3'<br>3'- G A -5'<br>15 14 | -11.78 (1.54)<br><br>-11.74 (1.54) | -8.34 (2.18)<br>-12.31<br><br>-8.32<br>-8.35 | -7.9 (2.03)<br>-12.23<br><br>-7.9<br>-7.91      |
| <b>Step 2</b><br><br>5 6<br>5'- Y G -3'<br>3'- A C -5'<br>14 13 | -13.31 (1.81)<br><br>-13.42 (1.79) | -8.64 (2.35)<br>-12.71<br><br>-8.67<br>-8.60 | -10.24 (2.16)<br>-14.32<br><br>-10.24<br>-10.24 |

| Base pairing energies       |                                    |                                                 |                                                              |
|-----------------------------|------------------------------------|-------------------------------------------------|--------------------------------------------------------------|
| <b>4 15</b><br><b>C - G</b> | -26.21 (3.00)<br><br>-26.23 (2.99) | -25.99 (3.08)<br>-23.42<br><br>-25.95<br>-26.03 | -25.94 (3.08)<br>-23.57<br><br>-25.97<br>-25.91              |
| <b>5 14</b><br><b>Y - A</b> | -10.80 (2.23)<br><br>-10.81 (2.22) | -9.65 (2.37)<br>-12.77<br><br>-9.64<br>-9.66    | -9.46 (2.24)<br>-12.38<br><br>-9.45<br>-9.47                 |
| <b>6 13</b><br><b>G - C</b> | -26.06 (3.03)<br><br>-26.04 (3.01) | -26.05 (3.01)<br>-24.06<br><br>-26.07<br>-26.04 | -26.03 (3.00) <sup>d</sup><br>-24.06<br><br>-26.05<br>-26.02 |

<sup>a</sup>The values reported in Dutta et al., 2023<sup>1</sup> from the last 400 ns of MD simulations (values from the second set of simulations are shown in purple).

<sup>b</sup>The values reported in Deb et al., 2019<sup>2</sup> for U-A pair.

<sup>c</sup>The values reported in Deb et al., 2019<sup>2</sup> for Ψ-A pair.

<sup>d</sup>This value was recalculated during the present study from the Coulomb and VDW components reported in Deb et al., 2019<sup>2</sup>

The values corresponding to the QM energies reported in Deb et al., 2019<sup>2</sup> are shown in blue.

The values obtained from the first 200 ns (of the 400 ns trajectory) are shown in brown.

The values obtained from the last 200 ns (of the 400 ns trajectory) are shown in green.

| (C)                                                             | $Y=m^1\Psi^a$                      | $Y=U^b$                                      | $Y=\Psi^c$                                   |
|-----------------------------------------------------------------|------------------------------------|----------------------------------------------|----------------------------------------------|
| <b>Stacking energies</b>                                        |                                    |                                              |                                              |
| <b>Step 1</b><br><br>4 5<br>5'- A Y -3'<br>3'- U A -5'<br>15 14 | -14.00 (1.82)<br><br>-14.02 (1.79) | -8.12 (2.16)<br>-11.44<br><br>-8.05<br>-8.18 | -8.39 (2.12)<br>-11.14<br><br>-8.35<br>-8.43 |
| <b>Step 2</b><br><br>5 6<br>5'- Y U -3'<br>3'- A A -5'<br>14 13 | -9.4 (1.39)<br><br>-9.41 (1.38)    | -6.59 (1.92)<br>-9.64<br><br>-6.57<br>-6.61  | -7.68 (1.83)<br>-10.69<br><br>-7.69<br>-7.67 |
| <b>Base pairing energies</b>                                    |                                    |                                              |                                              |

|                                                                                                                                                                                                                                                                                                                                                                                                                                                                                                                                                                                                                                                                            |                                    |                                              |                                              |
|----------------------------------------------------------------------------------------------------------------------------------------------------------------------------------------------------------------------------------------------------------------------------------------------------------------------------------------------------------------------------------------------------------------------------------------------------------------------------------------------------------------------------------------------------------------------------------------------------------------------------------------------------------------------------|------------------------------------|----------------------------------------------|----------------------------------------------|
| <b>4 15</b><br><b>A - U</b>                                                                                                                                                                                                                                                                                                                                                                                                                                                                                                                                                                                                                                                | -9.46 (2.39)<br><br>-9.48 (2.37)   | -9.31 (2.49)<br>-12.39<br><br>-9.39<br>-9.22 | -9.38 (2.40)<br>-12.47<br><br>-9.4<br>-9.36  |
| <b>5 14</b><br><b>Y - A</b>                                                                                                                                                                                                                                                                                                                                                                                                                                                                                                                                                                                                                                                | -10.65 (2.23)<br><br>-10.62 (2.26) | -9.41 (2.39)<br>-12.19<br><br>-9.41<br>-9.42 | -9.15 (2.32)<br>-12.02<br><br>-9.17<br>-9.13 |
| <b>6 13</b><br><b>U - A</b>                                                                                                                                                                                                                                                                                                                                                                                                                                                                                                                                                                                                                                                | -9.61 (2.30)<br><br>-9.62 (2.29)   | -9.67 (2.27)<br>-12.65<br><br>-9.67<br>-9.66 | -9.71 (2.26)<br>-12.77<br><br>-9.70<br>-9.71 |
| <p><sup>a</sup> The values reported in Dutta et al., 2023 <sup>1</sup> from the last 400 ns of MD simulations (values from the second set of simulations are shown in purple).</p> <p><sup>b</sup> The values reported in Deb et al., 2019 <sup>2</sup> for U-A pair.</p> <p><sup>c</sup> The values reported in Deb et al., 2019 <sup>2</sup> for Ψ-A pair.</p> <p>The values corresponding to the QM energies reported in Deb et al., <sup>2</sup> are shown in blue.</p> <p>The values obtained from the first 200 ns (of the 400 ns trajectory) are shown in brown.</p> <p>The values obtained from the last 200 ns (of the 400 ns trajectory) are shown in green.</p> |                                    |                                              |                                              |

| <b>(D)</b>                                                      | <b>Y=m<sup>1</sup>Ψ<sup>a</sup></b> | <b>Y=U<sup>b</sup></b>                          | <b>Y=Ψ<sup>c</sup></b>                          |
|-----------------------------------------------------------------|-------------------------------------|-------------------------------------------------|-------------------------------------------------|
| <b>Stacking energies</b>                                        |                                     |                                                 |                                                 |
| <b>Step 1</b><br><br>4 5<br>5'- U Y-3'<br>3'- A A -5'<br>15 14  | -11.17 (1.55)<br><br>-11.11 (1.59)  | -6.5 (1.93)<br>-9.62<br><br>-6.55<br>-6.43      | -6.13 (1.88)<br>-9.54<br><br>-6.13<br>-6.13     |
| <b>Step 2</b><br><br>5 6<br>5'- Y A -3'<br>3'- A U -5'<br>14 13 | -13.74 (1.93)<br><br>-13.86 (1.92)  | -10.42 (2.37)<br>-12.66<br><br>-10.34<br>-10.51 | -11.29 (3.16)<br>-13.62<br><br>-11.32<br>-11.26 |
| <b>Base pairing energies</b>                                    |                                     |                                                 |                                                 |
| <b>4 15</b><br><b>U - A</b>                                     | -9.55 (2.34)                        | -9.38 (2.37)<br>-12.19                          | -9.36 (2.37)<br>-12.23                          |

|                                                                                                                                                                                                                                                                                                                                                                                                                                                                                                                                                                                                                                                                          |                                |                                          |                                          |
|--------------------------------------------------------------------------------------------------------------------------------------------------------------------------------------------------------------------------------------------------------------------------------------------------------------------------------------------------------------------------------------------------------------------------------------------------------------------------------------------------------------------------------------------------------------------------------------------------------------------------------------------------------------------------|--------------------------------|------------------------------------------|------------------------------------------|
|                                                                                                                                                                                                                                                                                                                                                                                                                                                                                                                                                                                                                                                                          | -9.56 (2.29)                   | -9.40<br>-9.37                           | -9.35<br>-9.35                           |
| 5 14<br>Y - A                                                                                                                                                                                                                                                                                                                                                                                                                                                                                                                                                                                                                                                            | -10.74 (2.19)<br>-10.73 (2.17) | -9.63 (2.29)<br>-12.63<br>-9.65<br>-9.61 | -9.32 (2.25)<br>-12.17<br>-9.32<br>-9.33 |
| 6 13<br>A - U                                                                                                                                                                                                                                                                                                                                                                                                                                                                                                                                                                                                                                                            | -9.70 (2.26)<br>-9.66 (2.28)   | -9.70 (2.27)<br>-12.69<br>-9.69<br>-9.68 | -9.68 (2.29)<br>-12.65<br>-9.66<br>-9.68 |
| <p><sup>a</sup>The values reported in Dutta et al, 2023 <sup>1</sup> from the last 400 ns of MD simulations (values from the second set of simulations are shown in purple).</p> <p><sup>b</sup>The values reported in Deb et al, 2019 <sup>2</sup> for U-A pair.</p> <p><sup>c</sup>The values reported in Deb et al, 2019 <sup>2</sup> for Ψ-A pair.</p> <p>The values corresponding to the QM energies reported in Deb et al, 2019 <sup>2</sup> are shown in blue.</p> <p>The values obtained from the first 200 ns (of the 400 ns trajectory) are shown in brown.</p> <p>The values obtained from the last 200 ns (of the 400 ns trajectory) are shown in green.</p> |                                |                                          |                                          |

**Table S3.** Interaction energies (kcal/mol) of the base-pair steps containing the m<sup>1</sup>Ψ-A base pair obtained from the last 40 ns of MD simulations at 310K for (A) duplex-Gm<sup>1</sup>ΨC, (B) duplex-Cm<sup>1</sup>ΨG, (C) duplex-Am<sup>1</sup>ΨU and (D) duplex-Um<sup>1</sup>ΨA respectively.

| (A)                                                                        | (B)                                                                        | (C)                                                                        | (D)                                                                        |
|----------------------------------------------------------------------------|----------------------------------------------------------------------------|----------------------------------------------------------------------------|----------------------------------------------------------------------------|
| <b>Stacking energies</b>                                                   |                                                                            |                                                                            |                                                                            |
| <b>Step 1</b><br>4 5<br>5'- G m <sup>1</sup> Ψ -3'<br>3'- C A -5'<br>15 14 | <b>Step 1</b><br>4 5<br>5'- C m <sup>1</sup> Ψ -3'<br>3'- G A -5'<br>15 14 | <b>Step 1</b><br>4 5<br>5'- A m <sup>1</sup> Ψ -3'<br>3'- U A -5'<br>15 14 | <b>Step 1</b><br>4 5<br>5'- U m <sup>1</sup> Ψ -3'<br>3'- A A -5'<br>15 14 |
| -15.96<br>(1.82)<br>-15.97<br>(1.81)                                       | -11.67<br>(1.59)<br>-11.75<br>(1.52)                                       | -13.95<br>(1.82)<br>-14.05<br>(1.74)                                       | -11.13<br>(1.66)<br>-11.11<br>(1.52)                                       |
| <b>Step 2</b><br>5 6<br>5'- m <sup>1</sup> Ψ C -3'<br>3'- A G -5'<br>14 13 | <b>Step 2</b><br>5 6<br>5'- m <sup>1</sup> Ψ G -3'<br>3'- A C -5'<br>14 13 | <b>Step 2</b><br>5 6<br>5'- m <sup>1</sup> Ψ U -3'<br>3'- A A -5'<br>14 13 | <b>Step 2</b><br>5 6<br>5'- m <sup>1</sup> Ψ A -3'<br>3'- A U -5'<br>14 13 |
| -10.32<br>(1.73)<br>-10.26<br>(1.65)                                       | -13.30<br>(1.84)<br>-13.31<br>(1.80)                                       | -9.26<br>(1.43)<br>-9.49<br>(1.37)                                         | -13.55<br>(1.94)<br>-13.84<br>(1.95)                                       |
| <b>Base pairing energies</b>                                               |                                                                            |                                                                            |                                                                            |



|                                                                                                                                                                                                                           |                                          |                                          |                                          |                                          |                                          |                                          |                                          |
|---------------------------------------------------------------------------------------------------------------------------------------------------------------------------------------------------------------------------|------------------------------------------|------------------------------------------|------------------------------------------|------------------------------------------|------------------------------------------|------------------------------------------|------------------------------------------|
| <b>4 15</b><br><b>G - C</b>                                                                                                                                                                                               | -26.00<br>(3.18)<br><br>-26.06<br>(3.07) | <b>4 15</b><br><b>C - G</b>              | -26.17<br>(3.00)<br><br>-26.2<br>(3.04)  | <b>4 15</b><br><b>A - U</b>              | -9.37<br>(2.46)<br><br>-9.49<br>(2.36)   | <b>4 15</b><br><b>U - A</b>              | -9.51<br>(2.34)<br><br>-9.59<br>(2.29)   |
| <b>5 14</b><br><b>m<sup>1</sup>Ψ - A</b>                                                                                                                                                                                  | -10.47<br>(2.36)<br><br>-10.55<br>(2.30) | <b>5 14</b><br><b>m<sup>1</sup>Ψ - A</b> | -10.78<br>(2.22)<br><br>-10.74<br>(2.21) | <b>5 14</b><br><b>m<sup>1</sup>Ψ - A</b> | -10.59<br>(2.30)<br><br>-10.66<br>(2.23) | <b>5 14</b><br><b>m<sup>1</sup>Ψ - A</b> | -10.66<br>(2.19)<br><br>-10.72<br>(2.15) |
| <b>6 13</b><br><b>C - G</b>                                                                                                                                                                                               | -26.04<br>(3.07)<br><br>-26.11<br>(2.98) | <b>6 13</b><br><b>G - C</b>              | -25.99<br>(2.96)<br><br>-26.08<br>(2.94) | <b>6 13</b><br><b>U - A</b>              | -9.58<br>(2.33)<br><br>-9.60<br>(2.30)   | <b>6 13</b><br><b>A - U</b>              | -9.62<br>(2.26)<br><br>-9.68<br>(2.25)   |
| <sup>a</sup> The values obtained in this study from the last 40 ns of MD simulations at 310K (values for the first set of simulations are shown in black and those for the second set of simulations are shown in purple) |                                          |                                          |                                          |                                          |                                          |                                          |                                          |

**Table S4.** Interaction energies (kcal/mol) of the base-pair steps containing the m<sup>1</sup>Ψ-G mismatch for duplex-Gm<sup>1</sup>ΨC and those containing the U-G mismatch for duplex-GUC and the Ψ-G mismatch for duplex-GΨC

|                                                                        | <b>Y=m<sup>1</sup>Ψ<sup>a</sup></b> | <b>Y=U<sup>b</sup></b> | <b>Y=Ψ<sup>b</sup></b> |
|------------------------------------------------------------------------|-------------------------------------|------------------------|------------------------|
| <b>Stacking energies</b>                                               |                                     |                        |                        |
| <b>Step 1</b>                                                          | -16.76 (3.14)<br>-16.01 (2.86)      | -9.7 (2.57)            | -10.47 (2.81)          |
| <b>4 5</b><br><b>5'- G Y -3'</b><br><b>3'- C G -5'</b><br><b>15 14</b> |                                     | -9.61<br>-9.78         | -10.42<br>-10.52       |
| <b>Step 2</b>                                                          | -6.71 (2.16)<br>-7.07 (2.02)        | -6.29 (2.21)           | -6.71 (2.08)           |
| <b>5 6</b><br><b>5'- Y C -3'</b><br><b>3'- G G -5'</b><br><b>14 13</b> |                                     | -6.29<br>-6.28         | -6.66<br>-6.76         |
| <b>Base pairing energies</b>                                           |                                     |                        |                        |
| <b>4 15</b><br><b>G - C</b>                                            | -26.00 (3.05)<br>-25.96 (3.12)      | -26.04 (3.01)          | -26.08 (2.98)          |

|                                                                                                                                                                                                                                                                                                                                                                                                                                                                               |                                |                                       |                                       |
|-------------------------------------------------------------------------------------------------------------------------------------------------------------------------------------------------------------------------------------------------------------------------------------------------------------------------------------------------------------------------------------------------------------------------------------------------------------------------------|--------------------------------|---------------------------------------|---------------------------------------|
|                                                                                                                                                                                                                                                                                                                                                                                                                                                                               |                                | -25.99<br>-26.08                      | -26.07<br>-26.06                      |
| <b>5 14</b><br><b>Y - G</b>                                                                                                                                                                                                                                                                                                                                                                                                                                                   | -12.69 (2.64)<br>-13.16 (2.46) | -12.97 (2.33)<br><br>-12.96<br>-12.97 | -13.56 (2.32)<br><br>-13.56<br>-13.59 |
| <b>6 13</b><br><b>C - G</b>                                                                                                                                                                                                                                                                                                                                                                                                                                                   | -26.08 (3.23)<br>-26.15 (2.99) | -26.13 (2.99)<br><br>-26.13<br>-26.14 | -26.16 (2.96)<br><br>-26.15<br>-26.11 |
| <p><sup>a</sup> The values reported in Dutta et al. 2023<sup>1</sup> from the last 400 ns of MD simulations (values from the second set of simulations are shown in purple).</p> <p><sup>b</sup> The values reported in Dutta et al. 2023<sup>1</sup> from the last 400 ns of MD simulations (values obtained from the first 200 ns (of the 400 ns trajectory) are shown in brown and those obtained from the last 200 ns (of the 400 ns trajectory) are shown in green).</p> |                                |                                       |                                       |

**Table S5.** Interaction energies (kcal/mol) of the base-pair steps containing the m<sup>1</sup>Ψ-U mismatch for duplex-Gm<sup>1</sup>ΨC and those containing the U-U mismatch for duplex-GUC and those containing the Ψ-U mismatch for duplex-GΨC

|                                                                                                      | Y=m <sup>1</sup> Ψ <sup>a</sup> | Y=U <sup>b</sup>                      | Y=Ψ <sup>b</sup>                      |
|------------------------------------------------------------------------------------------------------|---------------------------------|---------------------------------------|---------------------------------------|
| <b>Stacking energies</b>                                                                             |                                 |                                       |                                       |
| <b>Step 1</b><br><b>4 5</b><br><b>5'- G m<sup>1</sup>Ψ -3'</b><br><b>3'- C U -5'</b><br><b>15 14</b> | -11.89 (3.22)<br>-12.13 (3.32)  | -4.98 (3.18)<br><br>-4.64<br>-5.33    | -5.65 (2.98)<br><br>-5.95<br>-5.35    |
| <b>Step 2</b><br><b>5 6</b><br><b>5'- m<sup>1</sup>Ψ C -3'</b><br><b>3'- U G -5'</b><br><b>14 13</b> | -6.62 (2.65)<br>-6.74 (2.63)    | -4.48 (3.10)<br><br>-4.90<br>-4.06    | -6.14 (2.81)<br><br>-6.05<br>-6.23    |
| <b>Base pairing energies</b>                                                                         |                                 |                                       |                                       |
| <b>4 15</b><br><b>G - C</b>                                                                          | -25.81 (3.18)<br>-25.80 (3.16)  | -25.56 (3.29)<br><br>-25.56<br>-25.55 | -25.80 (3.18)<br><br>-25.82<br>-25.78 |

|                                                                                                                                                                                                                                                                                                                                                                                                                                                                                 |                                       |                                          |                                          |
|---------------------------------------------------------------------------------------------------------------------------------------------------------------------------------------------------------------------------------------------------------------------------------------------------------------------------------------------------------------------------------------------------------------------------------------------------------------------------------|---------------------------------------|------------------------------------------|------------------------------------------|
|                                                                                                                                                                                                                                                                                                                                                                                                                                                                                 |                                       |                                          |                                          |
| <b>5 14</b><br><b>m<sup>1</sup>Ψ - U</b>                                                                                                                                                                                                                                                                                                                                                                                                                                        | -7.86 (2.97)<br><b>-7.09 (2.97)</b>   | -4.59 (2.91)<br><b>-4.52</b><br>-4.68    | -5.66 (2.74)<br><b>-5.74</b><br>-5.58    |
| <b>6 13</b><br><b>C - G</b>                                                                                                                                                                                                                                                                                                                                                                                                                                                     | -25.43 (3.42)<br><b>-25.38 (3.62)</b> | -25.63 (3.14)<br><b>-25.63</b><br>-25.61 | -25.59 (3.24)<br><b>-25.61</b><br>-25.58 |
| <p><sup>a</sup> The values reported in Dutta et al. 2023 <sup>1</sup> from the last 400 ns of MD simulations (values from the second set of simulations are shown in purple).</p> <p><sup>b</sup> The values reported in Dutta et al. 2023 <sup>1</sup> from the last 400 ns of MD simulations (values obtained from the first 200 ns (of the 400 ns trajectory) are shown in brown and those obtained from the last 200 ns (of the 400 ns trajectory) are shown in green).</p> |                                       |                                          |                                          |

**Table S6.** Interaction energies (kcal/mol) of the base-pair steps containing the m<sup>1</sup>Ψ-C mismatch for duplex-Gm<sup>1</sup>ΨC and those containing the U-C mismatch for duplex-GUC and the Ψ-C mismatch for duplex-GΨC

|                                                                                                      | Y=m <sup>1</sup> Ψ <sup>a</sup>       | Y=U <sup>b</sup>                         | Y=Ψ <sup>b</sup>                         |
|------------------------------------------------------------------------------------------------------|---------------------------------------|------------------------------------------|------------------------------------------|
| <b>Stacking energies</b>                                                                             |                                       |                                          |                                          |
| <b>Step 1</b><br><b>4 5</b><br><b>5'- G m<sup>1</sup>Ψ -3'</b><br><b>3'- C U -5'</b><br><b>15 14</b> | -14.46 (2.26)<br><b>-14.52 (2.41)</b> | -8.67 (4.21)<br><b>-8.46</b><br>-8.89    | -9.27 (2.53)<br><b>-9.05</b><br>-9.49    |
| <b>Step 2</b><br><b>5 6</b><br><b>5'- m<sup>1</sup>Ψ C -3'</b><br><b>3'- U G -5'</b><br><b>14 13</b> | -9.14 (2.65)<br><b>-9.31 (2.72)</b>   | -7.14 (3.36)<br><b>-6.71</b><br>-7.58    | -8.15 (3.33)<br><b>-7.63</b><br>-8.64    |
| <b>Base pairing energies</b>                                                                         |                                       |                                          |                                          |
| <b>4 15</b><br><b>G - C</b>                                                                          | -25.86 (3.12)<br><b>-25.90 (3.12)</b> | -25.57 (3.28)<br><b>-25.56</b><br>-25.58 | -25.71 (3.23)<br><b>-25.72</b><br>-25.69 |

|                                                                                                                                                                                                                                                                                                                                                                                                                                                                                 |                                       |                                          |                                          |
|---------------------------------------------------------------------------------------------------------------------------------------------------------------------------------------------------------------------------------------------------------------------------------------------------------------------------------------------------------------------------------------------------------------------------------------------------------------------------------|---------------------------------------|------------------------------------------|------------------------------------------|
|                                                                                                                                                                                                                                                                                                                                                                                                                                                                                 |                                       |                                          |                                          |
| <b>5 14</b><br><b>m<sup>1</sup>Ψ - U</b>                                                                                                                                                                                                                                                                                                                                                                                                                                        | -3.48 (2.87)<br><b>-3.72 (3.04)</b>   | -2.53 (2.75)<br><b>-2.45</b><br>-2.62    | -2.31 (2.89)<br><b>-2.09</b><br>-2.52    |
| <b>6 13</b><br><b>C - G</b>                                                                                                                                                                                                                                                                                                                                                                                                                                                     | -25.72 (3.46)<br><b>-25.44 (3.03)</b> | -25.85 (3.09)<br><b>-25.83</b><br>-25.86 | -25.86 (3.12)<br><b>-25.83</b><br>-25.89 |
| <p><sup>a</sup> The values reported in Dutta et al. 2023 <sup>1</sup> from the last 400 ns of MD simulations (values from the second set of simulations are shown in purple).</p> <p><sup>b</sup> The values reported in Dutta et al. 2023 <sup>1</sup> from the last 400 ns of MD simulations (values obtained from the first 200 ns (of the 400 ns trajectory) are shown in brown and those obtained from the last 200 ns (of the 400 ns trajectory) are shown in green).</p> |                                       |                                          |                                          |

**Table S7.** Nearest neighbor parameters (free energies in kcal/mol) for the U-A pair calculated using the energy values (A) obtained from MD using the LIE analysis and (B) obtained from QM calculations reported in Deb et al, 2019 <sup>2</sup>.

| <b>(A)</b>                                                             |                                                                          |                                                                          |                                                                           |                                                                          |
|------------------------------------------------------------------------|--------------------------------------------------------------------------|--------------------------------------------------------------------------|---------------------------------------------------------------------------|--------------------------------------------------------------------------|
| Base pair step 1                                                       | <b>GU</b><br><b>CA</b>                                                   | <b>CU</b><br><b>GA</b>                                                   | <b>AU</b><br><b>UA</b>                                                    | <b>UU</b><br><b>AA</b>                                                   |
| $E_{NN, binding}^{MD}$                                                 | -27.19<br><b>-27.195</b><br>-27.205                                      | -26.16<br><b>-26.115</b><br>-26.195                                      | -17.48<br><b>-17.45</b><br>-17.50                                         | -16.00<br><b>-16.075</b><br>-15.920                                      |
| $\Delta G_{37, MD, Predicted}^{\circ}$                                 | -2.24<br><b>-2.246</b><br>-2.248<br><br><b>-2.247</b><br><b>(0.0014)</b> | -2.12<br><b>-2.116</b><br>-2.126<br><br><b>-2.121</b><br><b>(0.0071)</b> | -1.08<br><b>-1.075</b><br>-1.082<br><br><b>-1.0785</b><br><b>(0.0049)</b> | -0.90<br><b>-0.911</b><br>-0.892<br><br><b>-0.902</b><br><b>(0.0134)</b> |
| $\Delta G_{37, Experiment}^{\circ}$<br>(Xia et al., 1998) <sup>3</sup> | -2.24 (0.06)                                                             | -2.08 (0.06)                                                             | -1.1 (0.08)                                                               | -0.93 (0.03)                                                             |
| $\Delta G_{37, Predicted}^{\circ}$<br>(Chou et al, 2016) <sup>9</sup>  | -1.95 ± 0.14                                                             | -2.19 ± 0.11                                                             | -0.91 ± 0.21                                                              | -1.13 ± 0.17                                                             |

|                                                                                   |                                                                          |                                                                          |                                                                          |                                                                          |
|-----------------------------------------------------------------------------------|--------------------------------------------------------------------------|--------------------------------------------------------------------------|--------------------------------------------------------------------------|--------------------------------------------------------------------------|
| $\Delta G^{\circ}_{37,\text{Predicted}}$<br>(Hopfinger et al, 2020) <sup>11</sup> | -2.03 ± 0.07                                                             | -2.16 ± 0.08                                                             | -1.11 ± 0.13                                                             | -0.94 (0.04)                                                             |
| $\Delta G^{\circ}_{37,\text{Predicted}}$<br>(Zuber et al., 2022) <sup>4</sup>     | -2.25 (0.06)                                                             | -2.01 (0.07)                                                             | -1.09 (0.07)                                                             | -0.94 (0.04)                                                             |
| Base pair step 2                                                                  | <b>UC</b><br><b>AG</b>                                                   | <b>UG</b><br><b>AC</b>                                                   | <b>UU</b><br><b>AA</b>                                                   | <b>UA</b><br><b>AU</b>                                                   |
| $E^{\text{MD}}_{\text{NN,binding}}$                                               | -27.11<br><b>-27.11</b><br>-27.065                                       | -26.49<br><b>-26.525</b><br>-26.450                                      | -16.13<br><b>-16.11</b><br>-16.15                                        | -20.08<br><b>-20.010</b><br>-20.155                                      |
| $\Delta G^{\circ}_{37,\text{MD,Predicted}}$                                       | -2.24<br><b>-2.236</b><br>-2.231<br><br><b>-2.234</b><br><b>(0.0035)</b> | -2.16<br><b>-2.166</b><br>-2.156<br><br><b>-2.161</b><br><b>(0.0071)</b> | -0.92<br><b>-0.915</b><br>-0.919<br><br><b>-0.917</b><br><b>(0.0028)</b> | -1.39<br><b>-1.383</b><br>-1.401<br><br><b>-1.392</b><br><b>(0.0127)</b> |
| $\Delta G^{\circ}_{37,\text{Experiment}}$<br>(Xia et al., 1998) <sup>3</sup>      | -2.35 (0.06)                                                             | -2.11 (0.07)                                                             | -0.93 (0.03)                                                             | -1.33 (0.09)                                                             |
| $\Delta G^{\circ}_{37,\text{Predicted}}$<br>(Chou et al, 2016) <sup>9</sup>       | -2.13 ± 0.09                                                             | -2.09 ± 0.10                                                             | -1.13 ± 0.17                                                             | -1.26 ± 0.20                                                             |
| $\Delta G^{\circ}_{37,\text{Predicted}}$<br>(Hopfinger et al, 2020) <sup>11</sup> | -2.18 ± 0.07                                                             | -2.19 ± 0.04                                                             | -1.02 ± 0.12                                                             | -1.34 ± 0.09                                                             |
| $\Delta G^{\circ}_{37,\text{Predicted}}$<br>(Zuber et al., 2022) <sup>4</sup>     | -2.42 (0.05)                                                             | -2.07 (0.07)                                                             | -0.94 (0.04)                                                             | -1.29 (0.08)                                                             |

Here  $E^{\text{MD}}_{\text{NN,binding}}$  and  $\Delta G^{\circ}_{37,\text{MD,Predicted}}$  were calculated using the formulas  $E_{\text{NN,binding}} = E_{\text{stack}} + 0.5 (E_{\text{HB}})$  and  $\Delta G^{\circ}_{37,\text{MD,Predicted}} = 0.1201 * E^{\text{MD}}_{\text{NN,binding}} + 1.0198$ .  $E_{\text{stack}}$  represents the stacking energy corresponding to a base pair step and  $E_{\text{HB}}$  represents the sum of hydrogen bonding (i.e.) base pairing energies of the two base pairs of the base pair step. The average values of the stacking and base pairing energies were considered during this calculation.

The values obtained from the last 400 ns of MD simulations<sup>1</sup>. The values obtained from the first 200 ns (of the 400 ns trajectory) are shown in brown and those obtained from the last 200 ns (of the 400 ns trajectory) are shown in green). The mean and average values (of the two 200 ns segments) are shown in black and bold font.

| <b>(B)</b>                                                                                                                                                                                                                                                                                                                                                                                                                |                  |                  |                  |                  |
|---------------------------------------------------------------------------------------------------------------------------------------------------------------------------------------------------------------------------------------------------------------------------------------------------------------------------------------------------------------------------------------------------------------------------|------------------|------------------|------------------|------------------|
| Base pair step 1                                                                                                                                                                                                                                                                                                                                                                                                          | <b>GU<br/>CA</b> | <b>CU<br/>GA</b> | <b>AU<br/>UA</b> | <b>UU<br/>AA</b> |
| $E_{NN, \text{binding}}^{\text{QM}}$                                                                                                                                                                                                                                                                                                                                                                                      | -29.98           | -30.4            | -23.73           | -22.03           |
| $\Delta G_{37, \text{QM, Predicted}}^{\circ}$                                                                                                                                                                                                                                                                                                                                                                             | <b>-2.08</b>     | <b>-2.09</b>     | <b>-1.14</b>     | <b>-0.89</b>     |
| $\Delta G_{37, \text{Experiment}}^{\circ}$<br>(Xia et al., 1998) <sup>3</sup>                                                                                                                                                                                                                                                                                                                                             | -2.24 (0.06)     | -2.08 (0.06)     | -1.1 (0.08)      | -0.93 (0.03)     |
| $\Delta G_{37, \text{Predicted}}^{\circ}$<br>(Chou et al, 2016) <sup>9</sup>                                                                                                                                                                                                                                                                                                                                              | $-1.95 \pm 0.14$ | $-2.19 \pm 0.11$ | $-0.91 \pm 0.21$ | $-1.13 \pm 0.17$ |
| $\Delta G_{37, \text{Predicted}}^{\circ}$<br>(Hopfinger et al, 2020) <sup>11</sup>                                                                                                                                                                                                                                                                                                                                        | $-2.03 \pm 0.07$ | $-2.16 \pm 0.08$ | $-1.11 \pm 0.13$ | -0.94 (0.04)     |
| $\Delta G_{37, \text{Predicted}}^{\circ}$<br>(Zuber et al., 2022) <sup>4</sup>                                                                                                                                                                                                                                                                                                                                            | -2.25 (0.06)     | -2.01 (0.07)     | -1.09 (0.07)     | -0.94 (0.04)     |
| Base pair step 2                                                                                                                                                                                                                                                                                                                                                                                                          | <b>UC<br/>AG</b> | <b>UG<br/>AC</b> | <b>UU<br/>AA</b> | <b>UA<br/>AU</b> |
| $E_{NN, \text{binding}}^{\text{QM}}$                                                                                                                                                                                                                                                                                                                                                                                      | -31              | -31.125          | -22.06           | -25.32           |
| $\Delta G_{37, \text{QM, Predicted}}^{\circ}$                                                                                                                                                                                                                                                                                                                                                                             | <b>-2.24</b>     | <b>-2.26</b>     | <b>-0.89</b>     | <b>-1.37</b>     |
| $\Delta G_{37, \text{Experiment}}^{\circ}$<br>(Xia et al., 1998) <sup>3</sup>                                                                                                                                                                                                                                                                                                                                             | -2.35 (0.06)     | -2.11 (0.07)     | -0.93 (0.03)     | -1.33 (0.09)     |
| $\Delta G_{37, \text{Predicted}}^{\circ}$<br>(Chou et al, 2016) <sup>9</sup>                                                                                                                                                                                                                                                                                                                                              | $-2.13 \pm 0.09$ | $-2.09 \pm 0.10$ | $-1.13 \pm 0.17$ | $-1.26 \pm 0.20$ |
| $\Delta G_{37, \text{Predicted}}^{\circ}$<br>(Hopfinger et al, 2020) <sup>11</sup>                                                                                                                                                                                                                                                                                                                                        | $-2.18 \pm 0.07$ | $-2.19 \pm 0.04$ | $-1.02 \pm 0.12$ | $-1.34 \pm 0.09$ |
| $\Delta G_{37, \text{Predicted}}^{\circ}$<br>(Zuber et al., 2022) <sup>4</sup>                                                                                                                                                                                                                                                                                                                                            | -2.42 (0.05)     | -2.07 (0.07)     | -0.94 (0.04)     | -1.29 (0.08)     |
| Here $E_{NN, \text{binding}}^{\text{QM}}$ and $\Delta G_{37, \text{QM, Predicted}}^{\circ}$ were calculated using the formulas $E_{NN, \text{binding}} = E_{\text{stack}} + 0.5 (E_{\text{HB}})$ and $\Delta G_{37, \text{QM, Predicted}}^{\circ} = 0.1516 * E_{NN, \text{binding}}^{\text{QM}} + 2.4593$ . $E_{\text{stack}}$ represents the stacking energy corresponding to a base pair step and represents the sum of |                  |                  |                  |                  |

hydrogen bonding (i.e.) base pairing energies of the two base pairs of the base pair step. The average values of the stacking and base pairing energies were considered during this calculation.

**Table S8.** Nearest neighbor parameters (free energies in kcal/mol) for the  $\Psi$ -A pair calculated using the energy values (A) obtained from MD using the LIE analysis and (B) obtained from QM calculations reported in Deb et al, 2019 <sup>2</sup>.

| <b>(A)</b>                                                                         |                                        |                                        |                                        |                                        |
|------------------------------------------------------------------------------------|----------------------------------------|----------------------------------------|----------------------------------------|----------------------------------------|
| Base pair step 1                                                                   | <b>G<math>\Psi</math></b><br><b>CA</b> | <b>C<math>\Psi</math></b><br><b>GA</b> | <b>A<math>\Psi</math></b><br><b>UA</b> | <b>U<math>\Psi</math></b><br><b>AA</b> |
| $E_{\text{NN, binding}}^{\text{MD}}$                                               | -28.04<br><b>-27.990</b><br>-28.050    | -25.6<br><b>-25.610</b><br>-25.600     | -17.66<br><b>-17.635</b><br>-17.675    | -15.47<br><b>-15.465</b><br>-15.470    |
| $\Delta G_{37, \text{MD, Predicted}}^{\circ}$                                      | -2.35<br><b>-2.342</b><br>-2.349       | -2.05<br><b>-2.056</b><br>-2.055       | -1.10<br><b>-1.098</b><br>-1.103       | -0.84<br><b>-0.838</b><br>-0.838       |
| $\Delta G_{37, \text{Experiment}}^{\circ}$<br>(Hudson et al, 2013) <sup>5</sup>    | -3.29                                  | -2.77                                  | -2.80                                  | -1.62                                  |
| $\Delta G_{37, \text{Experiment}}^{\circ}$<br>(Mauger et al, 2019) <sup>6</sup>    | -2.50 (0.08)                           | -2.10 (0.10)                           | NA                                     | NA                                     |
| $\Delta G_{37, \text{Predicted}}^{\circ}$<br>(Hopfinger et al, 2020) <sup>11</sup> | -1.46 (0.03)                           | -1.56 (0.02)                           | -0.61 (0.14)                           | -0.58 (0.08)                           |
| Base pair step 2                                                                   | <b><math>\Psi</math>C</b><br><b>AG</b> | <b><math>\Psi</math>G</b><br><b>AC</b> | <b><math>\Psi</math>U</b><br><b>AA</b> | <b><math>\Psi</math>A</b><br><b>AU</b> |
| $E_{\text{NN, binding}}^{\text{MD}}$                                               | -27.38<br><b>-27.340</b><br>-27.405    | -27.98<br><b>-27.990</b><br>-27.985    | -17.11<br><b>-17.125</b><br>-17.090    | -20.79<br><b>-20.810</b><br>-20.765    |
| $\Delta G_{37, \text{MD, Predicted}}^{\circ}$                                      | -2.27<br><b>-2.264</b>                 | -2.34<br><b>-2.342</b>                 | -1.04<br><b>-1.036</b>                 | -1.48<br><b>-1.479</b>                 |

|                                                                                    |                                            |                                            |                                             |                                             |
|------------------------------------------------------------------------------------|--------------------------------------------|--------------------------------------------|---------------------------------------------|---------------------------------------------|
|                                                                                    | -2.272<br><b>-2.268</b><br><b>(0.0056)</b> | -2.341<br><b>-2.342</b><br><b>(0.0007)</b> | -1.033<br><b>-1.0345</b><br><b>(0.0021)</b> | -1.474<br><b>-1.4765</b><br><b>(0.0035)</b> |
| $\Delta G^{\circ}_{37, \text{Experiment}}$<br>(Hudson et al, 2013) <sup>5</sup>    | -2.49                                      | -2.20                                      | -2.74                                       | -2.10                                       |
| $\Delta G^{\circ}_{37, \text{Experiment}}$<br>(Mauger et al, 2019) <sup>6</sup>    | -2.51 (0.10)                               | -2.35 (0.08)                               | NA                                          | NA                                          |
| $\Delta G^{\circ}_{37, \text{Predicted}}$<br>(Hopfinger et al, 2020) <sup>11</sup> | -1.68 (0.14)                               | -1.67 (0.02)                               | -0.66 (0.20)                                | -0.94 (0.22)                                |

Here  $E^{\text{MD}}_{\text{NN, binding}}$  and  $\Delta G^{\circ}_{37, \text{MD, Predicted}}$  were calculated using the formulas  $E(\text{NN, binding}) = E_{\text{stack}} + 0.5 (E_{\text{HB}})$  and  $\Delta G^{\circ}_{37, \text{MD, Predicted}} = 0.1201 * E^{\text{MD}}_{\text{NN, binding}} + 1.0198$ .  $E_{\text{stack}}$  represents the stacking energy corresponding to a base pair step and represents the sum of hydrogen bonding (i.e.) base pairing energies of the two base pairs of the base pair step. The average values of the stacking and base pairing energies were considered during this calculation.

The values obtained from the last 400 ns of MD simulations <sup>1</sup>. The values obtained from the first 200 ns (of the 400 ns trajectory) are shown in brown and those obtained from the last 200 ns (of the 400 ns trajectory) are shown in green). The mean and average values (of the two 200 ns segments) are shown in black and bold font.

| <b>(B)</b>                                                                         |                        |                        |                        |                        |
|------------------------------------------------------------------------------------|------------------------|------------------------|------------------------|------------------------|
| Base pair step 1                                                                   | <b>GΨ</b><br><b>CA</b> | <b>CΨ</b><br><b>GA</b> | <b>AΨ</b><br><b>UA</b> | <b>UΨ</b><br><b>AA</b> |
| $E^{\text{QM}}_{\text{NN, binding}}$                                               | -30.24                 | -30.205                | -23.38                 | -21.74                 |
| $\Delta G^{\circ}_{37, \text{QM, Predicted}}$                                      | <b>-2.13</b>           | <b>-2.12</b>           | <b>-1.08</b>           | <b>-0.84</b>           |
| $\Delta G^{\circ}_{37, \text{Experiment}}$<br>(Hudson et al, 2013) <sup>5</sup>    | -3.29                  | -2.77                  | -2.80                  | -1.62                  |
| $\Delta G^{\circ}_{37, \text{Experiment}}$<br>(Mauger et al, 2019) <sup>6</sup>    | -2.50 (0.08)           | -2.10 (0.10)           | NA                     | NA                     |
| $\Delta G^{\circ}_{37, \text{Predicted}}$<br>(Hopfinger et al, 2020) <sup>11</sup> | -1.46 (0.03)           | -1.56 (0.02)           | -0.61 (0.14)           | -0.58 (0.08)           |
| Base pair step 2                                                                   | <b>ΨC</b>              | <b>ΨG</b>              | <b>ΨU</b>              | <b>ΨA</b>              |



|                                                                                                                                                                                                                                                                                                                                                                                                                                                                                                                                                                                                                                                                                        | <b>AG</b>    | <b>AC</b>    | <b>AA</b>    | <b>AU</b>    |
|----------------------------------------------------------------------------------------------------------------------------------------------------------------------------------------------------------------------------------------------------------------------------------------------------------------------------------------------------------------------------------------------------------------------------------------------------------------------------------------------------------------------------------------------------------------------------------------------------------------------------------------------------------------------------------------|--------------|--------------|--------------|--------------|
| $E_{\text{NN, binding}}^{\text{QM}}$                                                                                                                                                                                                                                                                                                                                                                                                                                                                                                                                                                                                                                                   | -30.12       | -32.54       | -23.08       | -26.03       |
| $\Delta G_{37, \text{QM, Predicted}}^{\circ}$                                                                                                                                                                                                                                                                                                                                                                                                                                                                                                                                                                                                                                          | <b>-2.11</b> | <b>-2.47</b> | <b>-1.04</b> | <b>-1.49</b> |
| $\Delta G_{37, \text{Experiment}}^{\circ}$<br>(Hudson et al, 2013) <sup>5</sup>                                                                                                                                                                                                                                                                                                                                                                                                                                                                                                                                                                                                        | -2.49        | -2.20        | -2.74        | -2.10        |
| $\Delta G_{37, \text{Experiment}}^{\circ}$<br>(Mauger et al, 2019) <sup>6</sup>                                                                                                                                                                                                                                                                                                                                                                                                                                                                                                                                                                                                        | -2.51 (0.10) | -2.35 (0.08) | NA           | NA           |
| $\Delta G_{37, \text{Predicted}}^{\circ}$<br>(Hopfinger et al, 2020) <sup>11</sup>                                                                                                                                                                                                                                                                                                                                                                                                                                                                                                                                                                                                     | -1.68 (0.14) | -1.67 (0.02) | -0.66 (0.20) | -0.94 (0.22) |
| <p>Here <math>E_{\text{NN, binding}}^{\text{QM}}</math> and <math>\Delta G_{37, \text{QM, Predicted}}^{\circ}</math> were calculated using the formulas <math>E(\text{NN, binding}) = E_{\text{stack}} + 0.5 (E_{\text{HB}})</math> and <math>\Delta G_{37, \text{QM, Predicted}}^{\circ} = 0.1516 * E_{\text{NN, binding}}^{\text{QM}} + 2.4593</math>. <math>E_{\text{stack}}</math> represents the stacking energy corresponding to a base pair step and represents the sum of hydrogen bonding (i.e.) base pairing energies of the two base pairs of the base pair step. The average values of the stacking and base pairing energies were considered during this calculation.</p> |              |              |              |              |

**Table S9.** Nearest neighbor parameters (free energies in kcal/mol) for the m<sup>1</sup>Ψ-A pair calculated using the energy values obtained from MD using the LIE analysis.

| Base pair step 1                                                        | <b>Gm<sup>1</sup>Ψ<br/>CA</b>                             | <b>Cm<sup>1</sup>Ψ<br/>GA</b>                              | <b>Am<sup>1</sup>Ψ<br/>UA</b>                             | <b>Um<sup>1</sup>Ψ<br/>AA</b>                             |
|-------------------------------------------------------------------------|-----------------------------------------------------------|------------------------------------------------------------|-----------------------------------------------------------|-----------------------------------------------------------|
| $E_{\text{NN, binding}}^{\text{MD}}$<br>(From 300K simulation)          | -34.14<br><b>-34.24</b>                                   | -30.28<br><b>-30.26</b>                                    | -24.05<br><b>-24.07</b>                                   | -21.32<br><b>-21.26</b>                                   |
| $\Delta G_{37, \text{MD, Predicted}}^{\circ}$<br>(From 300K simulation) | -3.080<br><b>-3.092</b><br><br><b>-3.086<br/>(0.0085)</b> | -2.617<br><b>-2.614</b><br><br><b>-2.6155<br/>(0.0021)</b> | -1.869<br><b>-1.871</b><br><br><b>-1.870<br/>(0.0014)</b> | -1.541<br><b>-1.534</b><br><br><b>-1.538<br/>(0.0049)</b> |
| $E_{\text{NN, binding}}^{\text{MD}}$<br>(From 310K simulation)          | -34.22<br><b>-34.24</b>                                   | -30.14<br><b>-30.22</b>                                    | -23.93<br><b>-24.18</b>                                   | -21.22<br><b>-21.26</b>                                   |
| $\Delta G_{37, \text{MD, Predicted}}^{\circ}$<br>(From 310K simulation) | -3.090<br><b>-3.072</b>                                   | -2.600<br><b>-2.609</b>                                    | -1.854<br><b>-1.884</b>                                   | -1.529<br><b>-1.534</b>                                   |

|                                                                                                                                                                                                                                                                                                                                                                                                                                                                                                                                                                                                                                                                                                                                                                                                                                                                                                                                    |                                                             |                                                             |                                                             |                                                             |
|------------------------------------------------------------------------------------------------------------------------------------------------------------------------------------------------------------------------------------------------------------------------------------------------------------------------------------------------------------------------------------------------------------------------------------------------------------------------------------------------------------------------------------------------------------------------------------------------------------------------------------------------------------------------------------------------------------------------------------------------------------------------------------------------------------------------------------------------------------------------------------------------------------------------------------|-------------------------------------------------------------|-------------------------------------------------------------|-------------------------------------------------------------|-------------------------------------------------------------|
|                                                                                                                                                                                                                                                                                                                                                                                                                                                                                                                                                                                                                                                                                                                                                                                                                                                                                                                                    | <b>-3.081</b><br><b>(0.0127)</b>                            | <b>-2.604</b><br><b>(0.0064)</b>                            | <b>-1.869</b><br><b>(0.0212)</b>                            | <b>-1.532</b><br><b>(0.0035)</b>                            |
| $\Delta G^{\circ}_{37, \text{Experiment}}$<br>(Mauger et al, 2019) <sup>6</sup>                                                                                                                                                                                                                                                                                                                                                                                                                                                                                                                                                                                                                                                                                                                                                                                                                                                    | -2.43 (0.08)                                                | -1.83 (0.09)                                                | NA                                                          | NA                                                          |
| Base pair step 2                                                                                                                                                                                                                                                                                                                                                                                                                                                                                                                                                                                                                                                                                                                                                                                                                                                                                                                   | <b>m<sup>1</sup>ΨC</b><br><b>AG</b>                         | <b>m<sup>1</sup>ΨG</b><br><b>AC</b>                         | <b>m<sup>1</sup>ΨU</b><br><b>AA</b>                         | <b>m<sup>1</sup>ΨA</b><br><b>AU</b>                         |
| $E^{\text{MD}}_{\text{NN, binding}}$<br>(From 300K simulation)                                                                                                                                                                                                                                                                                                                                                                                                                                                                                                                                                                                                                                                                                                                                                                                                                                                                     | -28.47<br><b>-28.56</b>                                     | -31.74<br><b>-31.84</b>                                     | -19.53<br><b>-19.53</b>                                     | -23.96<br><b>-24.06</b>                                     |
| $\Delta G^{\circ}_{37, \text{MD, Predicted}}$<br>(From 300K simulation)                                                                                                                                                                                                                                                                                                                                                                                                                                                                                                                                                                                                                                                                                                                                                                                                                                                            | -2.399<br><b>-2.410</b><br><b>-2.405</b><br><b>(0.0078)</b> | -2.792<br><b>-2.804</b><br><b>-2.798</b><br><b>(0.0085)</b> | -1.326<br><b>-1.326</b><br><b>-1.326</b><br><b>(0)</b>      | -1.858<br><b>-1.869</b><br><b>-1.864</b><br><b>(0.0077)</b> |
| $E^{\text{MD}}_{\text{NN, binding}}$<br>(From 310K simulation)                                                                                                                                                                                                                                                                                                                                                                                                                                                                                                                                                                                                                                                                                                                                                                                                                                                                     | -28.58<br><b>-28.59</b>                                     | -31.68<br><b>-31.72</b>                                     | -19.34<br><b>-19.62</b>                                     | -23.69<br><b>-24.04</b>                                     |
| $\Delta G^{\circ}_{37, \text{MD, Predicted}}$<br>(From 310K simulation)                                                                                                                                                                                                                                                                                                                                                                                                                                                                                                                                                                                                                                                                                                                                                                                                                                                            | -2.413<br><b>-2.414</b><br><b>-2.414</b><br><b>(0.0007)</b> | -2.785<br><b>-2.789</b><br><b>-2.719</b><br><b>(0.0092)</b> | -1.303<br><b>-1.336</b><br><b>-1.319</b><br><b>(0.0233)</b> | -1.825<br><b>-1.867</b><br><b>-1.846</b><br><b>(0.0296)</b> |
| $\Delta G^{\circ}_{37, \text{Experiment}}$<br>(Mauger et al, 2019) <sup>6</sup>                                                                                                                                                                                                                                                                                                                                                                                                                                                                                                                                                                                                                                                                                                                                                                                                                                                    | -2.67 (0.08)                                                | -2.26 (0.07)                                                |                                                             |                                                             |
| <p>Here <math>E^{\text{MD}}_{\text{NN, binding}}</math> and <math>\Delta G^{\circ}_{37, \text{MD, Predicted}}</math> were calculated using the formulas <math>E(\text{NN, binding}) = E_{\text{stack}} + 0.5 (E_{\text{HB}})</math> and <math>\Delta G^{\circ}_{37, \text{MD, Predicted}} = 0.1201 * E^{\text{MD}}_{\text{NN, binding}} + 1.0198</math>. <math>E_{\text{stack}}</math> represents the stacking energy corresponding to a base pair step and represents the sum of hydrogen bonding (i.e.) base pairing energies of the two base pairs of the base pair step. The average values of the stacking and base pairing energies were considered during this calculation.</p> <p>The values obtained from the last 400 ns of MD simulations<sup>1</sup> (values from the second set of simulations are shown in purple). The mean and average values (of the two 400 ns replicates) are shown in black and bold font.</p> |                                                             |                                                             |                                                             |                                                             |

**Table S10.** Nearest neighbor parameters (free energies in kcal/mol) for the (A) m<sup>1</sup>Ψ-G, m<sup>1</sup>Ψ-U and m<sup>1</sup>Ψ-C mismatches and (B) the U-G, U-U and U-C mismatches and (C) the Ψ-G, Ψ-U and Ψ-C mismatches, calculated using the energy values obtained from MD using the LIE analysis

| <b>(A)</b>                                                                                                                                                                                                                                                                                                                                                                                                                                                                                                                                                                                                                                                                                                                                                                                                                                                                                                                          |                                                           |                                                           |                                                           |
|-------------------------------------------------------------------------------------------------------------------------------------------------------------------------------------------------------------------------------------------------------------------------------------------------------------------------------------------------------------------------------------------------------------------------------------------------------------------------------------------------------------------------------------------------------------------------------------------------------------------------------------------------------------------------------------------------------------------------------------------------------------------------------------------------------------------------------------------------------------------------------------------------------------------------------------|-----------------------------------------------------------|-----------------------------------------------------------|-----------------------------------------------------------|
| Base pair step 1                                                                                                                                                                                                                                                                                                                                                                                                                                                                                                                                                                                                                                                                                                                                                                                                                                                                                                                    | <b>Gm<sup>1</sup>Ψ<br/>CG</b>                             | <b>Gm<sup>1</sup>Ψ<br/>CU</b>                             | <b>Gm<sup>1</sup>Ψ<br/>CC</b>                             |
| $E_{NN, \text{binding}}^{\text{MD}}$                                                                                                                                                                                                                                                                                                                                                                                                                                                                                                                                                                                                                                                                                                                                                                                                                                                                                                | -35.62<br><b>-35.57</b>                                   | -28.72<br><b>-28.58</b>                                   | -29.13<br><b>-29.33</b>                                   |
| $\Delta G_{37, \text{MD, Predicted}}^{\circ}$                                                                                                                                                                                                                                                                                                                                                                                                                                                                                                                                                                                                                                                                                                                                                                                                                                                                                       | -3.258<br><b>-3.252</b><br><br><b>-3.255<br/>(0.0042)</b> | -2.429<br><b>-2.412</b><br><br><b>-2.421<br/>(0.0120)</b> | -2.478<br><b>-2.503</b><br><br><b>-2.491<br/>(0.0176)</b> |
| Base pair step 2                                                                                                                                                                                                                                                                                                                                                                                                                                                                                                                                                                                                                                                                                                                                                                                                                                                                                                                    | <b>m<sup>1</sup>ΨC<br/>GG</b>                             | <b>m<sup>1</sup>ΨC<br/>UG</b>                             | <b>m<sup>1</sup>ΨC<br/>CG</b>                             |
| $E_{NN, \text{binding}}^{\text{MD}}$                                                                                                                                                                                                                                                                                                                                                                                                                                                                                                                                                                                                                                                                                                                                                                                                                                                                                                | -25.62<br><b>-26.72</b>                                   | -23.26<br><b>-22.98</b>                                   | -23.47<br><b>-23.89</b>                                   |
| $\Delta G_{37, \text{MD, Predicted}}^{\circ}$                                                                                                                                                                                                                                                                                                                                                                                                                                                                                                                                                                                                                                                                                                                                                                                                                                                                                       | -2.057<br><b>-2.189</b><br><br><b>-2.123 (0.0933)</b>     | -1.774<br><b>-1.740</b><br><br><b>-1.757 (0.0240)</b>     | -1.798<br><b>-1.849</b><br><br><b>-1.824 (0.0360)</b>     |
| <p>Here <math>E_{NN, \text{binding}}^{\text{MD}}</math> and <math>\Delta G_{37, \text{MD, Predicted}}^{\circ}</math> were calculated using the formulas <math>E_{NN, \text{binding}} = E_{\text{stack}} + 0.5 (E_{\text{HB}})</math> and <math>\Delta G_{37, \text{MD, Predicted}}^{\circ} = 0.1201 * E_{NN, \text{binding}}^{\text{MD}} + 1.0198</math>. <math>E_{\text{stack}}</math> represents the stacking energy corresponding to a base pair step and represents the sum of hydrogen bonding (i.e.) base pairing energies of the two base pairs of the base pair step. The average values of the stacking and base pairing energies were considered during this calculation.</p> <p>The values obtained from the last 400 ns of MD simulations<sup>1</sup> (values from the second set of simulations are shown in purple). The mean and average values (of the two 400 ns replicates) are shown in black and bold font.</p> |                                                           |                                                           |                                                           |

| <b>(B)</b>                                    |                                          |                                          |                                          |
|-----------------------------------------------|------------------------------------------|------------------------------------------|------------------------------------------|
| Base pair step 1                              | <b>GU<br/>CG</b>                         | <b>GU<br/>CU</b>                         | <b>GU<br/>CC</b>                         |
| $E_{NN, \text{binding}}$                      | -29.21<br><b>-29.08</b><br><b>-29.31</b> | -20.06<br><b>-19.68</b><br><b>-20.44</b> | -22.72<br><b>-22.46</b><br><b>-22.99</b> |
| $\Delta G_{37, \text{MD, Predicted}}^{\circ}$ | -2.49                                    | -1.39                                    | -1.71                                    |

|                                                                                |                                                            |                                                                              |                                                                              |
|--------------------------------------------------------------------------------|------------------------------------------------------------|------------------------------------------------------------------------------|------------------------------------------------------------------------------|
|                                                                                | -2.473<br>-2.500<br><br><b>-2.486</b><br><b>(0.0191)</b>   | -1.344<br>-1.435<br><br><b>-1.389</b><br><b>(0.0643)</b>                     | -1.678<br>-1.741<br><br><b>-1.709</b><br><b>(0.0445)</b>                     |
| $\Delta G^\circ_{37, \text{Experiment}}$<br>(Mathews et al, 1999) <sup>7</sup> | -2.51 (0.25)                                               | NA                                                                           | NA                                                                           |
| $\Delta G^\circ_{37, \text{Experiment}}$<br>(Chen et al, 2012) <sup>8</sup>    | -2.15 (0.10)                                               |                                                                              |                                                                              |
| $\Delta G^\circ_{37, \text{Predicted}}$<br>(Chou et al, 2016) <sup>9</sup>     | -1.96 (0.19)                                               |                                                                              |                                                                              |
| $\Delta G^\circ_{37, \text{Predicted}}$<br>(Zuber et al, 2022) <sup>4</sup>    | -2.23 (0.07)                                               |                                                                              |                                                                              |
| Base pair step 2                                                               | <b>UC</b><br><b>GG</b>                                     | <b>UC</b><br><b>UG</b>                                                       | <b>UC</b><br><b>CG</b>                                                       |
| $E_{\text{NN, binding}}$                                                       | -25.84<br><br><b>-25.84</b><br>-25.84                      | -19.59<br><br><b>-19.98</b><br>-19.21                                        | -21.33<br><br><b>-20.85</b><br>-21.82                                        |
| $\Delta G^\circ_{37, \text{MD, Predicted}}$                                    | -2.08<br><br><b>-2.08</b><br>-2.08<br><br><b>-2.08 (0)</b> | -1.33<br><br><b>-1.379</b><br>-1.287<br><br><b>-1.333</b><br><b>(0.0650)</b> | -1.54<br><br><b>-1.484</b><br>-1.600<br><br><b>-1.542</b><br><b>(0.0820)</b> |
| $\Delta G^\circ_{37, \text{Experiment}}$<br>(Mathews et al, 1999) <sup>7</sup> | -1.53 (0.27)                                               | NA                                                                           | NA                                                                           |
| $\Delta G^\circ_{37, \text{Experiment}}$<br>(Chen et al, 2012) <sup>8</sup>    | -1.80 (0.09)                                               |                                                                              |                                                                              |
| $\Delta G^\circ_{37, \text{Predicted}}$<br>(Chou et al, 2016) <sup>9</sup>     | -1.50 (0.23)                                               |                                                                              |                                                                              |
| $\Delta G^\circ_{37, \text{Predicted}}$<br>(Zuber et al, 2022) <sup>4</sup>    | -1.80 (0.07)                                               |                                                                              |                                                                              |

Here  $E_{\text{NN, binding}}^{\text{MD}}$  and  $\Delta G_{37, \text{MD, Predicted}}^{\circ}$  were calculated using the formulas  $E_{\text{NN, binding}} = E_{\text{stack}} + 0.5 (E_{\text{HB}})$  and  $\Delta G_{37, \text{MD, Predicted}}^{\circ} = 0.1201 * E_{\text{NN, binding}}^{\text{MD}} + 1.0198$ .  $E_{\text{stack}}$  represents the stacking energy corresponding to a base pair step and represents the sum of hydrogen bonding (i.e.) base pairing energies of the two base pairs of the base pair step. The average values of the stacking and base pairing energies were considered during this calculation.

The values obtained from the last 400 ns of MD simulations<sup>1</sup>. The values obtained from the first 200 ns (of the 400 ns trajectory) are shown in brown and those obtained from the last 200 ns (of the 400 ns trajectory) are shown in green). The mean and average values (of the two 200 ns segments) are shown in black and bold font.

| (C)                                                                                                                                |                            |                            |                            |
|------------------------------------------------------------------------------------------------------------------------------------|----------------------------|----------------------------|----------------------------|
| Base pair step 1                                                                                                                   | <b>GΨ<br/>CG</b>           | <b>GΨ<br/>CU</b>           | <b>GΨ<br/>CC</b>           |
| $E_{\text{NN, binding}}^{\text{MD}}$                                                                                               | -30.29                     | -21.38                     | -23.28                     |
|                                                                                                                                    | -30.24                     | -21.73                     | -22.96                     |
|                                                                                                                                    | -30.34                     | -21.03                     | -23.59                     |
| $\Delta G_{37, \text{MD, Predicted}}^{\circ}$                                                                                      | -2.62                      | -1.55                      | -1.78                      |
|                                                                                                                                    | -2.612                     | -1.589                     | -1.738                     |
|                                                                                                                                    | -2.624                     | -1.506                     | -1.813                     |
|                                                                                                                                    | <b>-2.618<br/>(0.0085)</b> | <b>-1.548<br/>(0.0586)</b> | <b>-1.776<br/>(0.0530)</b> |
| Base pair step 2                                                                                                                   | <b>ΨC<br/>GG</b>           | <b>ΨC<br/>UG</b>           | <b>ΨC<br/>CG</b>           |
| $E_{\text{NN, binding}}^{\text{MD}}$                                                                                               | -26.53                     | -21.76                     | -22.24                     |
|                                                                                                                                    | -26.52                     | -21.72                     | -21.59                     |
|                                                                                                                                    | -26.61                     | -21.81                     | -22.84                     |
| $\Delta G_{37, \text{MD, Predicted}}^{\circ}$                                                                                      | -2.17                      | -1.59                      | -1.65                      |
|                                                                                                                                    | -2.165                     | -1.588                     | -1.573                     |
|                                                                                                                                    | -2.176                     | -1.599                     | -1.723                     |
|                                                                                                                                    | <b>-2.171<br/>(0.0077)</b> | <b>-1.594<br/>(0.0077)</b> | <b>-1.648<br/>(0.1060)</b> |
| Here $E_{\text{NN, binding}}^{\text{MD}}$ and $\Delta G_{37, \text{MD, Predicted}}^{\circ}$ were calculated using the formulas $E$ |                            |                            |                            |

$(NN, \text{binding}) = E_{\text{stack}} + 0.5 (E_{\text{HB}})$  and  $\Delta G_{37, \text{MD, Predicted}}^{\circ} = 0.1201 * E_{\text{NN, binding}}^{\text{MD}} + 1.0198$ .  $E_{\text{stack}}$  represents the stacking energy corresponding to a base pair step and represents the sum of hydrogen bonding (i.e.) base pairing energies of the two base pairs of the base pair step. The average values of the stacking and base pairing energies were considered during this calculation.

The values obtained from the last 400 ns of MD simulations<sup>1</sup>. The values obtained from the first 200 ns (of the 400 ns trajectory) are shown in brown and those obtained from the last 200 ns (of the 400 ns trajectory) are shown in green). The mean and average values (of the two 200 ns segments) are shown in black and bold font.

**Table S11.** Comparison of the free energies (kcal/mol) of duplexes containing internal  $\Psi$ -A pair studied in this work.

| Duplex                                                                                                                                                                                                                                                                                                    | $-\Delta G_{37, \text{Expt}}^{\circ}$<br>(Kierzek et al, 2014) <sup>10</sup> | $-\Delta G_{37, \text{MD, Pred}}^{\circ}$<br>(This work) | $-\Delta G_{37, \text{QM, Pred}}^{\circ}$<br>(This work) | $-\Delta G_{37, \text{Pred}}^{\circ}$<br>(Hudson et al, 2013) <sup>5</sup> | $-\Delta G_{37, \text{Pred}}^{\circ}$<br>(Hopfinger et al, 2020) <sup>11</sup> | $\Delta G_{37, \text{Pred}}^{\circ}$<br>(Mauger et al. 2019) <sup>6</sup> |
|-----------------------------------------------------------------------------------------------------------------------------------------------------------------------------------------------------------------------------------------------------------------------------------------------------------|------------------------------------------------------------------------------|----------------------------------------------------------|----------------------------------------------------------|----------------------------------------------------------------------------|--------------------------------------------------------------------------------|---------------------------------------------------------------------------|
| <b>UCAG<math>\Psi</math>CAGU</b><br><b>AGUCAGUCA</b>                                                                                                                                                                                                                                                      | 12.85                                                                        | 12.594                                                   | 12.22                                                    | 13.69                                                                      | 11.12                                                                          | 12.99                                                                     |
| <b>UCAC<math>\Psi</math>GAGU</b><br><b>AGUGACUCA</b>                                                                                                                                                                                                                                                      | 14.44                                                                        | 12.378                                                   | 12.57                                                    | 13.28                                                                      | 11.21                                                                          | 12.43                                                                     |
| <b>UCAA<math>\Psi</math>UAGU</b><br><b>AGUAAUCA</b>                                                                                                                                                                                                                                                       | 8.36                                                                         | 8.185                                                    | 8.17                                                     | 11.41                                                                      | 7.32                                                                           | NA                                                                        |
| <b>UCAU<math>\Psi</math>AAGU</b><br><b>AGUAAUUCA</b>                                                                                                                                                                                                                                                      | 8.42                                                                         | 8.134                                                    | 8.15                                                     | 9.37                                                                       | 7.34                                                                           | NA                                                                        |
| <b>MSE</b>                                                                                                                                                                                                                                                                                                |                                                                              | 1.107                                                    | 1.0007                                                   | 3.06                                                                       | 3.92                                                                           | 2.03                                                                      |
| <b>RMSE</b>                                                                                                                                                                                                                                                                                               |                                                                              | 1.05                                                     | 1.00035                                                  | 1.75                                                                       | 1.98                                                                           | 1.42                                                                      |
| The predicted values of the free energies of the duplexes were calculated using the Xia et al., 1998 <sup>3</sup> parameters for the WC pairs and the NN free energy parameters for the NN pairs containing $\Psi$ reported in the present study and also those reported in earlier studies as indicated. |                                                                              |                                                          |                                                          |                                                                            |                                                                                |                                                                           |

**Table S12.** Comparison of the free energies (kcal/mol) of duplexes (from Hudson et al, <sup>5</sup>) containing internal  $\Psi$ -A pair.

| Duplex | $-\Delta G_{37, \text{Expt}}^{\circ}$<br>(Hudson et al, | $-\Delta G_{37, \text{MD, Pred}}^{\circ}$<br>(This work) | $-\Delta G_{37, \text{QM, Pred}}^{\circ}$<br>(This work) | $-\Delta G_{37, \text{Pred}}^{\circ}$<br>(Hudson et | $-\Delta G_{37, \text{Pred}}^{\circ}$<br>(Hopfinger | $-\Delta G_{37, \text{Pred}}^{\circ}$<br>(Mauger et al. |
|--------|---------------------------------------------------------|----------------------------------------------------------|----------------------------------------------------------|-----------------------------------------------------|-----------------------------------------------------|---------------------------------------------------------|
|--------|---------------------------------------------------------|----------------------------------------------------------|----------------------------------------------------------|-----------------------------------------------------|-----------------------------------------------------|---------------------------------------------------------|

|                    | 2013) <sup>5</sup> |       |       | al, 2013) <sup>5</sup> | et al, 2020) <sup>11</sup> | 2019) <sup>6</sup> |
|--------------------|--------------------|-------|-------|------------------------|----------------------------|--------------------|
| CGAΨACG<br>GCUAUGC | 9.93               | 7.79  | 7.79  | 10.12                  | 6.77                       | NA                 |
| CGCΨACG<br>GCGAUGC | 10.96              | 9.82  | 9.9   | 11.16                  | 8.79                       | NA                 |
| CGGΨACG<br>GCCAUGC | 11.71              | 9.95  | 9.75  | 11.52                  | 8.53                       | NA                 |
| CGUΨACG<br>GCAAUGC | 9.10               | 7.42  | 7.44  | 8.83                   | 6.63                       | NA                 |
| CGAΨCCG<br>GCUAGGC | 11.92              | 9.61  | 9.43  | 11.53                  | 8.53                       | NA                 |
| CGCΨCCG<br>GCGAGGC | 12.93              | 11.63 | 11.54 | 12.57                  | 10.55                      | 11.92              |
| CGGΨCCG<br>GCCAGGC | 12.76              | 11.76 | 11.39 | 12.93                  | 10.29                      | 12.16              |
| CGUΨCCG<br>GCAAGGC | 9.76               | 9.24  | 9.08  | 10.24                  | 8.39                       | NA                 |
| CGAΨGCG<br>GCUACGC | 11.45              | 9.84  | 9.95  | 11.40                  | 8.68                       | NA                 |
| CGCΨGCG<br>GCGACGC | 12.35              | 11.87 | 12.06 | 12.44                  | 10.70                      | 11.92              |
| CGGΨGCG<br>GCCACGC | 12.59              | 11.99 | 11.91 | 12.80                  | 10.44                      | 12.16              |
| CGUΨGCG<br>GCAACGC | 10.34              | 9.47  | 9.6   | 10.11                  | 8.54                       | NA                 |
| CGAΨUCG<br>GCUAAGC | 10.42              | 7.46  | 7.45  | 10.87                  | 6.60                       | NA                 |
| CGCΨUCG<br>GCGAAGC | 12.06              | 9.49  | 9.56  | 11.91                  | 8.62                       | NA                 |
| CGGΨUCG<br>GCCAAGC | 12.51              | 9.62  | 9.41  | 12.27                  | 8.36                       | NA                 |
| CGUΨUCG<br>GCAAAGC | 9.51               | 7.09  | 7.1   | 9.58                   | 6.46                       | NA                 |

|      |  |                                  |      |                                  |                                  |                                 |
|------|--|----------------------------------|------|----------------------------------|----------------------------------|---------------------------------|
| MSE  |  | 3.35<br>(number of duplexes =16) | 3.54 | 0.07<br>(number of duplexes =16) | 7.95<br>(number of duplexes =16) | 0.44<br>(number of duplexes =4) |
| RMSE |  | 1.83                             | 1.88 | 0.26                             | 2.82                             | 0.66                            |

**Table S13.** Comparison of the free energies (kcal/mol) of duplexes containing internal m<sup>1</sup>Ψ-A pair studied in this work.

| Duplex                                                                                                                                                                                                                                                                                                 | $-\Delta G^{\circ}_{37,MD,Pred}$ (This work) | $-\Delta G^{\circ}_{37,Pred}$ (Mauger et al. 2019) <sup>6</sup> |
|--------------------------------------------------------------------------------------------------------------------------------------------------------------------------------------------------------------------------------------------------------------------------------------------------------|----------------------------------------------|-----------------------------------------------------------------|
| UCAGm <sup>1</sup> ΨCAGU<br>AGUCAGUCA                                                                                                                                                                                                                                                                  | 13.471                                       | 13.08                                                           |
| UCACm <sup>1</sup> ΨGAGU<br>AGUGACUCA                                                                                                                                                                                                                                                                  | 13.39                                        | 12.07                                                           |
| UCAAm <sup>1</sup> ΨUAGU<br>AGUAAUCA                                                                                                                                                                                                                                                                   | 9.25                                         | NA                                                              |
| UCAUm <sup>1</sup> ΨAAGU<br>AGUAAUCA                                                                                                                                                                                                                                                                   | 9.22                                         |                                                                 |
| The predicted values of the free energies of the duplexes were calculated using the Xia et al., <sup>3</sup> parameters for the WC pairs and the NN free energy parameters for the NN pairs containing m <sup>1</sup> Ψ reported in the present study and those reported in Mauger et al. <sup>6</sup> |                                              |                                                                 |

**Table S14.** Comparison of the free energies (kcal/mol) of duplexes containing mismatches studied in this work.

| Duplex                 | Y=U                                                                |                                              | Y=Ψ                                                                |                                              | Y=m <sup>1</sup> Ψ                          |
|------------------------|--------------------------------------------------------------------|----------------------------------------------|--------------------------------------------------------------------|----------------------------------------------|---------------------------------------------|
|                        | $-\Delta G^{\circ}_{37, Expt}$ (Kierzek et al, 2014) <sup>10</sup> | $-\Delta G^{\circ}_{37,MD,Pred}$ (This work) | $-\Delta G^{\circ}_{37, Expt}$ (Kierzek et al, 2014) <sup>10</sup> | $-\Delta G^{\circ}_{37,MD,Pred}$ (This work) | $\Delta G^{\circ}_{37,MD,Pred}$ (This work) |
| UCAGYCAGU<br>AGUCGGUCA | 12.01<br>(0.18)                                                    | 12.55                                        | 13.41<br>(0.27)                                                    | 12.77                                        | 13.36                                       |
| UCAGYCAGU<br>AGUCUGUCA | 8.58<br>(0.05)                                                     | 10.70                                        | 9.35<br>(0.13)                                                     | 11.12                                        | 12.16                                       |



|                                                                                                                                                                                                                                   |                |       |                |       |       |
|-----------------------------------------------------------------------------------------------------------------------------------------------------------------------------------------------------------------------------------|----------------|-------|----------------|-------|-------|
| UCAGYCAGU<br>AGUCCGUCA                                                                                                                                                                                                            | 8.07<br>(0.05) | 11.23 | 8.34<br>(0.02) | 11.40 | 12.29 |
| The predicted values of the free energies of the duplexes were calculated using the Xia et al., 1998 <sup>3</sup> parameters for the WC pairs and the NN free energy parameters for the mismatches reported in the present study. |                |       |                |       |       |

**Table S15.** Interaction energies (kcal/mol) of the base-pair steps containing Y-A, Y-G, Y-U and Y-C pairs (where Y=> U, Ψ, m<sup>1</sup>Ψ) obtained from MD simulations at 300K using the CHARMM36 parameters.

|                                                                                                                        | <b>Duplex-1</b><br>Context: GUC(U-A)                              | <b>Duplex-2</b><br>Context: CUG(U-A)                              | <b>Duplex-3</b><br>Context: UUA(U-A)                              | <b>Duplex-4</b><br>Context: AUU(U-A)                              |
|------------------------------------------------------------------------------------------------------------------------|-------------------------------------------------------------------|-------------------------------------------------------------------|-------------------------------------------------------------------|-------------------------------------------------------------------|
| <b>Stacking energies</b>                                                                                               |                                                                   |                                                                   |                                                                   |                                                                   |
| <b>Step 1</b>                                                                                                          | ELEC 0.60 (1.33)<br>VDW -14.06 (1.23)<br><br>TOTAL -13.46 (1.81)  | ELEC 0.23 (1.32)<br>VDW -14.15 (1.08)<br><br>TOTAL -13.92 (1.71)  | ELEC 1.27 (1.13)<br>VDW -13.50 (1.12)<br><br>TOTAL -12.23 (1.59)  | ELEC 2.01 (1.19)<br>VDW -12.93 (1.52)<br><br>-10.92 (1.93)        |
| <b>Step 2</b>                                                                                                          | ELEC 0.69 (1.38)<br>VDW -14.44 (1.09)<br><br>TOTAL -13.75 (1.76)  | ELEC -0.52 (1.20)<br>VDW -14.50 (0.93)<br><br>TOTAL -15.02 (1.52) | ELEC -3.19 (1.41)<br>VDW -13.45 (1.01)<br><br>TOTAL -16.64 (1.73) | ELEC 1.07 (1.25)<br>VDW -13.42 (1.23)<br><br>TOTAL -12.35 (1.75)  |
| <b>Base pairing energies</b>                                                                                           |                                                                   |                                                                   |                                                                   |                                                                   |
| <b>4 15</b>                                                                                                            | ELEC -22.02 (2.92)<br>VDW -0.29 (1.51)<br><br>TOTAL -22.31 (3.28) | ELEC -22.56 (3.48)<br>VDW -0.18 (1.52)<br><br>TOTAL -23.74 (3.79) | ELEC -10.42 (2.75)<br>VDW -0.29 (1.40)<br><br>TOTAL -10.71 (3.08) | ELEC -9.95 (3.57)<br>VDW -0.26 (1.39)<br><br>TOTAL -10.21 (3.83)  |
| <b>5 14</b>                                                                                                            | ELEC -10.64 (2.17)<br>VDW -0.38 (1.38)<br><br>TOTAL -11.02 (2.57) | ELEC -11.27 (1.98)<br>VDW -0.15 (1.44)<br><br>TOTAL -11.42 (2.45) | ELEC -11.06 (2.11)<br>VDW -0.23 (1.43)<br><br>TOTAL -11.29 (2.55) | ELEC -9.98 (3.44)<br>VDW -0.28 (1.38)<br><br>TOTAL -10.26 (3.71)  |
| <b>6 13</b>                                                                                                            | ELEC -23.18 (2.47)<br>VDW -0.07 (1.56)<br><br>TOTAL -23.25 (2.92) | ELEC -22.87 (2.45)<br>VDW -0.21 (1.54)<br><br>TOTAL -23.08 (2.89) | ELEC -11.09 (1.95)<br>VDW -0.29 (1.39)<br><br>TOTAL -11.38 (2.39) | ELEC -11.10 (2.05)<br>VDW -0.26 (1.40)<br><br>TOTAL -11.36 (2.48) |
| The values reported in this table were obtained from the last 100 ns of 150 ns MD simulations of the duplexes at 300K. |                                                                   |                                                                   |                                                                   |                                                                   |

|  | <b>Duplex-5</b><br>Context: GUC(U-G) | <b>Duplex-6</b><br>Context: GUC(U-U) | <b>Duplex-7</b><br>Context: GUC(U-C) |
|--|--------------------------------------|--------------------------------------|--------------------------------------|
|--|--------------------------------------|--------------------------------------|--------------------------------------|

| <b>Stacking energies</b>                                                                                               |                                        |                                        |                                        |
|------------------------------------------------------------------------------------------------------------------------|----------------------------------------|----------------------------------------|----------------------------------------|
| <b>Step 1</b>                                                                                                          | ELEC -2.88 (2.06)<br>VDW -14.17 (1.34) | ELEC 0.72 (2.25)<br>VDW -9.99 (1.93)   | ELEC -0.49 (2.24)<br>VDW -10.58 (1.77) |
|                                                                                                                        | TOTAL -17.05 (2.46)                    | TOTAL -9.27 (2.96)                     | TOTAL -11.07 (2.85)                    |
| <b>Step 2</b>                                                                                                          | ELEC 1.75 (2.08)<br>VDW -14.10 (1.07)  | ELEC 0.48 (2.13)<br>VDW -10.08 (1.84)  | ELEC -0.11 (2.36)<br>VDW -10.93 (1.75) |
|                                                                                                                        | TOTAL -12.35 (2.34)                    | TOTAL -9.6 (2.81)                      | TOTAL -11.04 (2.94)                    |
| <b>Base pairing energies</b>                                                                                           |                                        |                                        |                                        |
| <b>4 15</b>                                                                                                            | ELEC -21.48 (2.63)<br>VDW -0.60 (1.43) | ELEC -21.91 (4.89)<br>VDW -0.26 (1.49) | ELEC -21.02 (5.51)<br>VDW 0.35 (1.44)  |
|                                                                                                                        | TOTAL -22.08 (2.99)                    | TOTAL -22.17 (5.11)                    | TOTAL -20.67 (5.69)                    |
| <b>5 14</b>                                                                                                            | ELEC -11.17 (3.28)<br>VDW -0.43 (1.15) | ELEC -1.82 (2.82)<br>VDW -0.29 (0.54)  | -2.22 (2.95)<br>VDW -0.36 (0.67)       |
|                                                                                                                        | TOTAL -11.6 (3.48)                     | TOTAL -2.11 (2.87)                     | TOTAL -2.58 (3.02)                     |
| <b>6 13</b>                                                                                                            | ELEC -24.12 (2.29)<br>VDW 0.09 (1.62)  | ELEC -22.34 (4.22)<br>VDW 0.14 (1.56)  | ELEC -22.80 (2.59)<br>VDW -0.21 (1.55) |
|                                                                                                                        | TOTAL -24.03 (2.81)                    | TOTAL -22.2 (4.49)                     | TOTAL -23.01 (3.02)                    |
| The values reported in this table were obtained from the last 250 ns of 300 ns MD simulations of the duplexes at 300K. |                                        |                                        |                                        |

|                              | <b>Duplex-8<br/>Context: GΨC(Ψ-A)</b>  | <b>Duplex-9<br/>Context: CΨG(Ψ-A)</b>  | <b>Duplex-10<br/>Context: UΨA(Ψ-A)</b> | <b>Duplex-11<br/>Context: AΨU(Ψ-A)</b> |
|------------------------------|----------------------------------------|----------------------------------------|----------------------------------------|----------------------------------------|
| <b>Stacking energies</b>     |                                        |                                        |                                        |                                        |
| <b>Step 1</b>                | ELEC 0.21 (1.23)<br>VDW -14.38 (1.05)  | ELEC 1.96 (1.30)<br>VDW -14.54 (0.90)  | ELEC 1.95 (1.10)<br>VDW -13.59 (1.04)  | ELEC 2.51 (1.08)<br>VDW -13.39 (1.16)  |
|                              | TOTAL -14.17 (1.62)                    | TOTAL -12.58 (2.5)                     | TOTAL -11.64 (1.51)                    | TOTAL -10.88 (1.58)                    |
| <b>Step 2</b>                | ELEC 0.49 (1.46)<br>VDW -14.73 (1.04)  | ELEC -0.46 (1.29)<br>VDW -14.52 (0.90) | ELEC -2.48 (1.42)<br>VDW -13.39 (1.12) | ELEC 0.88 (1.01)<br>VDW -13.78 (0.93)  |
|                              | TOTAL -14.24 (1.79)                    | TOTAL -14.98 (1.57)                    | TOTAL -15.87 (1.81)                    | TOTAL -12.9 (1.37)                     |
| <b>Base pairing energies</b> |                                        |                                        |                                        |                                        |
| <b>4 15</b>                  | ELEC -22.73 (2.68)<br>VDW -0.26 (1.51) | ELEC -23.39 (2.50)<br>VDW -0.19 (1.55) | ELEC -10.87 (2.09)<br>VDW -0.32 (1.39) | ELEC -10.32 (3.01)                     |

|             |                                                               |                                                               |                                                               |                                                               |
|-------------|---------------------------------------------------------------|---------------------------------------------------------------|---------------------------------------------------------------|---------------------------------------------------------------|
|             | TOTAL -22.99 (3.08)                                           | TOTAL -23.58 (2.94)                                           | TOTAL -11.19 (2.51)                                           | VDW -0.29 (1.39)<br>TOTAL -10.61 (3.32)                       |
| <b>5 14</b> | ELEC -10.43 (1.94)<br>VDW -0.16 (1.45)<br>TOTAL -10.59 (2.42) | ELEC -10.73 (1.85)<br>VDW -0.11 (1.44)<br>TOTAL -10.84 (2.34) | ELEC -10.37 (2.36)<br>VDW -0.16 (1.41)<br>TOTAL -10.53 (2.75) | ELEC -10.45 (1.93)<br>VDW -0.13 (1.43)<br>TOTAL -10.58 (2.40) |
| <b>6 13</b> | ELEC -23.32 (3.26)<br>VDW 0.01 (1.56)<br>TOTAL -23.31 (3.61)  | ELEC -23.20 (2.48)<br>VDW -0.19 (0.56)<br>TOTAL -23.39 (2.54) | ELEC -11.11 (1.99)<br>VDW -0.29 (1.38)<br>TOTAL -11.40 (2.42) | ELEC -11.02 (1.99)<br>VDW -0.33 (1.38)<br>TOTAL -11.35 (2.42) |

The values reported in this table were obtained from the last 100 ns of 150 ns MD simulations of the duplexes at 300K.

|                              | <b>Duplex-12</b><br>Context: GΨC(Ψ-G)                         | <b>Duplex-13</b><br>Context: GΨC(Ψ-U)                         | <b>Duplex-14</b><br>Context: GΨC(Ψ-C)                         |
|------------------------------|---------------------------------------------------------------|---------------------------------------------------------------|---------------------------------------------------------------|
| <b>Stacking energies</b>     |                                                               |                                                               |                                                               |
| <b>Step 1</b>                | ELEC -1.71 (1.93)<br>VDW -14.49 (1.34)<br>TOTAL -16.20 (2.35) | ELEC 1.28 (2.08)<br>VDW -10.82 (1.85)<br>TOTAL -9.54 (2.78)   | ELEC -0.24 (1.64)<br>VDW -10.13 (2.19)<br>TOTAL -10.37 (2.74) |
| <b>Step 2</b>                | ELEC 1.32 (1.99)<br>VDW -14.16 (1.06)<br>TOTAL -12.84 (2.25)  | ELEC 2.06 (2.38)<br>VDW -11.28 (1.79)<br>TOTAL -9.22 (2.98)   | ELEC 1.15 (1.96)<br>VDW -11.28 (1.55)<br>TOTAL -10.13 (2.49)  |
| <b>Base pairing energies</b> |                                                               |                                                               |                                                               |
| <b>4 15</b>                  | ELEC -21.50 (2.78)<br>VDW -0.58 (1.41)<br>TOTAL -22.08 (3.12) | ELEC -21.66 (4.20)<br>VDW -0.23 (1.49)<br>TOTAL -21.89 (4.46) | ELEC -22.31 (3.74)<br>VDW -0.36 (1.47)<br>TOTAL -22.67 (4.02) |
| <b>5 14</b>                  | ELEC -10.77 (2.68)<br>VDW -0.36 (1.18)<br>TOTAL -11.13 (2.93) | ELEC -3.77 (3.09)<br>VDW -0.37 (0.77)<br>-4.14 (3.18)         | ELEC -2.65 (2.16)<br>VDW -0.29 (0.80)<br>-2.94 (2.30)         |
| <b>6 13</b>                  | ELEC -24.02 (2.36)<br>VDW 0.07 (1.61)<br>TOTAL -23.95 (2.86)  | ELEC -22.31 (4.01)<br>VDW -0.13 (1.54)<br>TOTAL -22.44 (4.29) | ELEC -21.88 (2.68)<br>VDW -0.43 (1.46)<br>TOTAL -22.31 (3.05) |

|  | <b>Duplex-15</b> | <b>Duplex-16</b> | <b>Duplex-17</b> | <b>Duplex-18</b> |
|--|------------------|------------------|------------------|------------------|
|--|------------------|------------------|------------------|------------------|

|                                                                                                                        | <b>Context:<br/>Gm<sup>1</sup>ΨC(m<sup>1</sup>Ψ-A)</b>             | <b>Context:<br/>Cm<sup>1</sup>ΨG(m<sup>1</sup>Ψ-A)</b>            | <b>Context:<br/>Um<sup>1</sup>ΨA(m<sup>1</sup>Ψ-A)</b>            | <b>Context:<br/>Am<sup>1</sup>ΨU(m<sup>1</sup>Ψ-A)</b>            |
|------------------------------------------------------------------------------------------------------------------------|--------------------------------------------------------------------|-------------------------------------------------------------------|-------------------------------------------------------------------|-------------------------------------------------------------------|
| <b>Stacking energies</b>                                                                                               |                                                                    |                                                                   |                                                                   |                                                                   |
| <b>Step 1</b>                                                                                                          | ELEC 0.01 (1.22)<br>VDW -15.44 (1.10)<br><br>TOTAL -15.43 (1.64)   | ELEC 0.05 (1.46)<br>VDW -14.30 (1.06)<br><br>TOTAL -14.25 (1.80)  | ELEC 0.95 (1.19)<br>VDW -13.42 (1.18)<br><br>TOTAL -12.47 (1.68)  | ELEC 2.59 (1.04)<br>VDW -14.58 (1.15)<br><br>TOTAL -11.99 (1.55)  |
| <b>Step 2</b>                                                                                                          | ELEC 0.62 (1.43)<br>VDW -15.15 (1.01)<br><br>TOTAL -14.53 (1.75)   | ELEC 1.17 (1.22)<br>VDW -14.58 (0.90)<br><br>TOTAL -13.41 (1.52)  | ELEC -2.51 (1.49)<br>VDW -13.49 (1.05)<br><br>TOTAL -16.00 (1.82) | ELEC 0.94 (0.96)<br>VDW -14.28 (0.94)<br><br>TOTAL -13.34 (1.34)  |
| <b>Base pairing energies</b>                                                                                           |                                                                    |                                                                   |                                                                   |                                                                   |
| <b>4 15</b>                                                                                                            | ELEC -23.01 (3.21)<br>VDW -0.19 (1.51)<br><br>TOTAL -23.2 (3.54)   | ELEC -23.06 (3.28)<br>VDW -0.21 (1.48)<br><br>TOTAL -23.27 (3.59) | ELEC -11.01 (2.14)<br>VDW -0.27 (1.43)<br><br>TOTAL -11.28 (2.57) | ELEC -10.45 (2.92)<br>VDW -0.32 (1.39)<br><br>TOTAL -10.77 (3.23) |
| <b>5 14</b>                                                                                                            | ELEC -9.73 (1.85)<br>VDW -0.36 (1.36)<br><br>TOTAL -9.37 (2.29)    | ELEC -10.13 (1.89)<br>VDW -0.24 (1.39)<br><br>TOTAL -10.37 (2.35) | ELEC -9.77 (2.31)<br>VDW -0.34 (1.34)<br><br>TOTAL -10.11 (2.67)  | ELEC -9.87 (1.81)<br>VDW -0.25 (1.39)<br><br>TOTAL -10.12 (2.28)  |
| <b>6 13</b>                                                                                                            | ELEC -23.37 (2.85)<br>VDW -0.002 (1.57)<br><br>TOTAL -23.37 (3.25) | ELEC -23.70 (2.46)<br>VDW -0.09 (1.58)<br><br>TOTAL -23.79 (2.92) | ELEC -11.16 (1.95)<br>VDW -0.26 (1.40)<br><br>TOTAL -11.42 (2.40) | ELEC -10.89 (2.09)<br>VDW -0.37 (1.39)<br><br>TOTAL -11.26 (2.51) |
| The values reported in this table were obtained from the last 100 ns of 150 ns MD simulations of the duplexes at 300K. |                                                                    |                                                                   |                                                                   |                                                                   |

|                              | <b>Duplex-12<br/>Context: Gm<sup>1</sup>ΨC(m<sup>1</sup>Ψ-G)</b> | <b>Duplex-13<br/>Context: Gm<sup>1</sup>ΨC(m<sup>1</sup>Ψ-U)</b> | <b>Duplex-14<br/>Context: Gm<sup>1</sup>ΨC(m<sup>1</sup>Ψ-C)</b>  |
|------------------------------|------------------------------------------------------------------|------------------------------------------------------------------|-------------------------------------------------------------------|
| <b>Stacking energies</b>     |                                                                  |                                                                  |                                                                   |
| <b>Step 1</b>                | ELEC -1.73 (1.86)<br>VDW -15.17 (1.45)<br><br>TOTAL -16.9 (2.36) | ELEC 0.95 (2.25)<br>VDW -12.17 (1.88)<br><br>TOTAL -11.22 (2.93) | ELEC -0.37 (1.59)<br>VDW -12.48 (2.19)<br><br>TOTAL -12.85 (2.71) |
| <b>Step 2</b>                | ELEC 2.08 (2.26)<br>VDW -14.29 (1.15)<br><br>TOTAL -12.21 (2.54) | ELEC 1.46 (2.04)<br>VDW -11.58 (1.70)<br><br>TOTAL -10.12 (2.65) | ELEC 0.90 (1.78)<br>VDW -12.48 (1.58)<br><br>TOTAL -11.58 (2.38)  |
| <b>Base pairing energies</b> |                                                                  |                                                                  |                                                                   |

|                                                                                                                        |                                                                   |                                                                   |                                                                   |
|------------------------------------------------------------------------------------------------------------------------|-------------------------------------------------------------------|-------------------------------------------------------------------|-------------------------------------------------------------------|
| <b>4 15</b>                                                                                                            | ELEC -21.84 (2.75)<br>VDW -0.53 (1.45)<br><br>TOTAL -22.37 (3.11) | ELEC -22.84 (3.23)<br>VDW -0.16 (1.54)<br><br>TOTAL -23.00 (3.58) | ELEC -22.34 (4.20)<br>VDW -0.25 (1.51)<br><br>TOTAL -22.59 (4.46) |
| <b>5 14</b>                                                                                                            | ELEC -10.52 (2.71)<br>VDW -0.44 (1.13)<br><br>TOTAL -10.96 (2.94) | ELEC -2.95 (2.97)<br>VDW -0.49 (0.69)<br><br>TOTAL -3.44 (3.05)   | ELEC -3.59 (2.09)<br>VDW -0.49 (0.81)<br><br>TOTAL -4.08 (2.24)   |
| <b>6 13</b>                                                                                                            | ELEC -23.79 (2.48)<br>VDW 0.05 (1.62)<br><br>TOTAL -23.84 (2.96)  | ELEC -22.37 (4.68)<br>VDW -0.11 (1.55)<br><br>TOTAL -22.48 (4.93) | ELEC -23.44 (2.60)<br>VDW -0.18 (1.55)<br><br>TOTAL -23.62 (3.03) |
| The values reported in this table were obtained from the last 250 ns of 300 ns MD simulations of the duplexes at 300K. |                                                                   |                                                                   |                                                                   |

**Table S16.** Nearest neighbor parameters (free energies in kcal/mol) for the nearest neighbor pairs containing Y-A, Y-G, Y-U and Y-C pairs (where Y=> U,  $\Psi$ ,  $m^1\Psi$ ) calculated using the energy values obtained from MD (with CHARMM36 parameters) using the LIE analysis.

| <b>NN pairs</b>                                                           | <b>GU<br/>CA</b> | <b>CU<br/>GA</b> | <b>AU<br/>UA</b> | <b>UU<br/>AA</b> | <b>GU<br/>CG</b> | <b>CU<br/>GU</b> | <b>UU<br/>AC</b> |
|---------------------------------------------------------------------------|------------------|------------------|------------------|------------------|------------------|------------------|------------------|
| $E_{NN, binding}^{MD}$                                                    | -30.125          | -31.50           | -21.16           | -23.23           | -33.89           | -21.41           | -22.69           |
| $\Delta G_{37, MD, Predicted}^{\circ}$                                    | <b>-1.97</b>     | <b>-2.14</b>     | <b>-0.87</b>     | <b>-1.12</b>     | <b>-2.44</b>     | <b>-0.90</b>     | <b>-1.06</b>     |
| $\Delta G_{37, Experiment}^{\circ}$<br>(Xia et al., 1998) <sup>3</sup>    | -2.24<br>(0.06)  | -2.08<br>(0.06)  | -1.1<br>(0.08)   | -0.93<br>(0.03)  | N.A.             |                  |                  |
| $\Delta G_{37, Experiment}^{\circ}$<br>(Mathews et al, 1999) <sup>7</sup> | N.A.             |                  |                  |                  | -2.51<br>(0.25)  | N.A.             |                  |
| $\Delta G_{37, Experiment}^{\circ}$<br>(Chen et al, 2012) <sup>8</sup>    | N.A.             |                  |                  |                  | -2.15<br>(0.10)  | N.A.             |                  |
| <b>NN pairs</b>                                                           | <b>UC<br/>AG</b> | <b>UG<br/>AC</b> | <b>UA<br/>AU</b> | <b>UU<br/>AA</b> | <b>UC<br/>GG</b> | <b>UG<br/>UC</b> | <b>UA<br/>CU</b> |

|                                                                                                                                                                                                                                                                                                                                                                                                                                                                                                                                                                                                                                                                                            |                 |                 |                 |                 |                 |              |              |
|--------------------------------------------------------------------------------------------------------------------------------------------------------------------------------------------------------------------------------------------------------------------------------------------------------------------------------------------------------------------------------------------------------------------------------------------------------------------------------------------------------------------------------------------------------------------------------------------------------------------------------------------------------------------------------------------|-----------------|-----------------|-----------------|-----------------|-----------------|--------------|--------------|
| $E_{\text{NN, binding}}^{\text{MD}}$                                                                                                                                                                                                                                                                                                                                                                                                                                                                                                                                                                                                                                                       | -30.885         | -32.27          | -27.98          | -23.16          | -30.16          | -21.76       | -23.84       |
| $\Delta G_{37, \text{MD, Predicted}}^{\circ}$                                                                                                                                                                                                                                                                                                                                                                                                                                                                                                                                                                                                                                              | <b>-2.07</b>    | <b>-2.24</b>    | <b>-1.71</b>    | <b>-1.12</b>    | <b>-1.98</b>    | <b>-0.94</b> | <b>-1.20</b> |
| $\Delta G_{37, \text{Experiment}}^{\circ}$ (Xia et al., 1998) <sup>3</sup>                                                                                                                                                                                                                                                                                                                                                                                                                                                                                                                                                                                                                 | -2.35<br>(0.06) | -2.11<br>(0.07) | -1.33<br>(0.09) | -0.93<br>(0.03) | N.A.            |              |              |
| $\Delta G_{37, \text{Experiment}}^{\circ}$ (Mathews et al, 1999) <sup>7</sup>                                                                                                                                                                                                                                                                                                                                                                                                                                                                                                                                                                                                              | N.A.            |                 |                 |                 | -1.53<br>(0.27) | N.A.         |              |
| $\Delta G_{37, \text{Experiment}}^{\circ}$ (Chen et al, 2012) <sup>8</sup>                                                                                                                                                                                                                                                                                                                                                                                                                                                                                                                                                                                                                 | N.A.            |                 |                 |                 | -1.80<br>(0.09) | N.A.         |              |
| <p>Here <math>E_{\text{NN, binding}}^{\text{MD}}</math> and <math>\Delta G_{37, \text{MD, Predicted}}^{\circ}</math> were calculated using the formulas <math>E_{\text{NN, binding}}^{\text{MD}} = E_{\text{stack}} + 0.5 (E_{\text{HB}})</math> and <math>\Delta G_{37, \text{MD, Predicted}}^{\circ} = 0.1229 * E_{\text{NN, binding}}^{\text{MD}} + 1.7277</math> (This equation was obtained from linear regression of the <math>E_{\text{NN, binding}}^{\text{MD}}</math> values with the available experimental nearest neighbor free energies (<math>\Delta G_{37, \text{Experiment}}^{\circ}</math>) (Xia et al., 1998)<sup>3</sup> for the canonical nearest neighbor pairs).</p> |                 |                 |                 |                 |                 |              |              |

| <b>NN pairs</b>                                                              | <b>GΨ<br/>CA</b> | <b>CΨ<br/>GA</b> | <b>AΨ<br/>UA</b> | <b>UΨ<br/>AA</b> | <b>GΨ<br/>CG</b> | <b>CΨ<br/>GU</b> | <b>UΨ<br/>AC</b> |
|------------------------------------------------------------------------------|------------------|------------------|------------------|------------------|------------------|------------------|------------------|
| $E_{\text{NN, binding}}^{\text{MD}}$                                         | -30.96           | 29.79            | -21.48           | -22.50           | -32.81           | -22.56           | -23.18           |
| $\Delta G_{37, \text{MD, Predicted}}^{\circ}$                                | <b>-2.08</b>     | <b>-1.93</b>     | <b>-0.91</b>     | <b>-1.04</b>     | <b>-2.30</b>     | <b>-1.04</b>     | <b>-1.12</b>     |
| $\Delta G_{37, \text{Experiment}}^{\circ}$ (Mauger et al, 2019) <sup>6</sup> | -2.50<br>(0.08)  | -2.10<br>(0.10)  | N.A.             |                  |                  |                  |                  |
| $\Delta G_{37, \text{Experiment}}^{\circ}$ (Hudson et al, 2013) <sup>5</sup> | -3.29            | -2.77            | -2.80            | -1.62            | N.A.             |                  |                  |
| <b>NN pairs</b>                                                              | <b>ΨC<br/>AG</b> | <b>ΨG<br/>AC</b> | <b>ΨU<br/>AA</b> | <b>ΨA<br/>AU</b> | <b>ΨC<br/>GG</b> | <b>ΨG<br/>UC</b> | <b>ΨA<br/>CU</b> |
| $E_{\text{NN, binding}}^{\text{MD}}$                                         | -31.19           | -32.09           | -23.86           | -26.84           | -30.38           | -22.51           | -22.76           |

|                                                                                                                                                                                                                                            |                 |                 |              |              |              |              |              |
|--------------------------------------------------------------------------------------------------------------------------------------------------------------------------------------------------------------------------------------------|-----------------|-----------------|--------------|--------------|--------------|--------------|--------------|
| $\Delta G^{\circ}_{37,MD,Predicted}$                                                                                                                                                                                                       | <b>-2.11</b>    | <b>-2.22</b>    | <b>-1.20</b> | <b>-1.57</b> | <b>-2.01</b> | <b>-1.04</b> | <b>-1.07</b> |
| $\Delta G^{\circ}_{37,Experiment}$<br>(Mauger et al, 2019) <sup>6</sup>                                                                                                                                                                    | -2.51<br>(0.10) | -2.35<br>(0.08) | N.A.         |              |              |              |              |
| $\Delta G^{\circ}_{37,Experiment}$<br>(Hudson et al, 2013) <sup>5</sup>                                                                                                                                                                    | -2.49           | -2.20           | -2.74        | -2.10        | N.A.         |              |              |
| Here $E^{MD}_{NN,binding}$ and $\Delta G^{\circ}_{37,MD,Predicted}$ were calculated using the formulas $E^{MD}_{NN,binding} = E_{stack} + 0.5 (E_{HB})$ and $\Delta G^{\circ}_{37,MD,Predicted} = 0.1229 * E^{MD}_{NN,binding} + 1.7277$ . |                 |                 |              |              |              |              |              |

| <b>NN pairs</b>                                                                                                                                                                                                                            | <b>Gm<sup>1</sup>Ψ<br/>CA</b> | <b>Cm<sup>1</sup>Ψ<br/>GA</b> | <b>Am<sup>1</sup>Ψ<br/>UA</b> | <b>Um<sup>1</sup>Ψ<br/>AA</b> | <b>Gm<sup>1</sup>Ψ<br/>CG</b> | <b>Cm<sup>1</sup>Ψ<br/>GU</b> | <b>Um<sup>1</sup>Ψ<br/>AC</b> |
|--------------------------------------------------------------------------------------------------------------------------------------------------------------------------------------------------------------------------------------------|-------------------------------|-------------------------------|-------------------------------|-------------------------------|-------------------------------|-------------------------------|-------------------------------|
| $E^{MD}_{NN,binding}$                                                                                                                                                                                                                      | -31.72                        | -31.07                        | -22.44                        | -23.16                        | -33.56                        | -24.44                        | -26.18                        |
| $\Delta G^{\circ}_{37,MD,Predicted}$                                                                                                                                                                                                       | <b>-2.17</b>                  | <b>-2.09</b>                  | <b>-1.03</b>                  | <b>-1.12</b>                  | <b>-2.39</b>                  | <b>-1.28</b>                  | <b>-1.49</b>                  |
| $\Delta G^{\circ}_{37,Experiment}$<br>(Mauger et al, 2019) <sup>6</sup>                                                                                                                                                                    | -2.43<br>(0.08)               | -1.83<br>(0.09)               | N.A.                          |                               |                               |                               |                               |
| <b>NN pairs</b>                                                                                                                                                                                                                            | <b>m<sup>1</sup>ΨC<br/>AG</b> | <b>m<sup>1</sup>ΨG<br/>AC</b> | <b>m<sup>1</sup>ΨU<br/>AA</b> | <b>m<sup>1</sup>ΨA<br/>AU</b> | <b>m<sup>1</sup>ΨC<br/>GG</b> | <b>m<sup>1</sup>ΨG<br/>UC</b> | <b>m<sup>1</sup>ΨA<br/>CU</b> |
| $E^{MD}_{NN,binding}$                                                                                                                                                                                                                      | -30.90                        | -30.49                        | -24.03                        | -26.76                        | -29.61                        | -23.08                        | -25.43                        |
| $\Delta G^{\circ}_{37,MD,Predicted}$                                                                                                                                                                                                       | <b>-2.07</b>                  | <b>-2.02</b>                  | <b>-1.39</b>                  | <b>-1.75</b>                  | <b>-1.91</b>                  | <b>-1.11</b>                  | <b>-1.39</b>                  |
| $\Delta G^{\circ}_{37,Experiment}$<br>(Mauger et al, 2019) <sup>6</sup>                                                                                                                                                                    | -2.67<br>(0.08)               | -2.26<br>(0.07)               | N.A.                          |                               |                               |                               |                               |
| Here $E^{MD}_{NN,binding}$ and $\Delta G^{\circ}_{37,MD,Predicted}$ were calculated using the formulas $E^{MD}_{NN,binding} = E_{stack} + 0.5 (E_{HB})$ and $\Delta G^{\circ}_{37,MD,Predicted} = 0.1229 * E^{MD}_{NN,binding} + 1.7277$ . |                               |                               |                               |                               |                               |                               |                               |

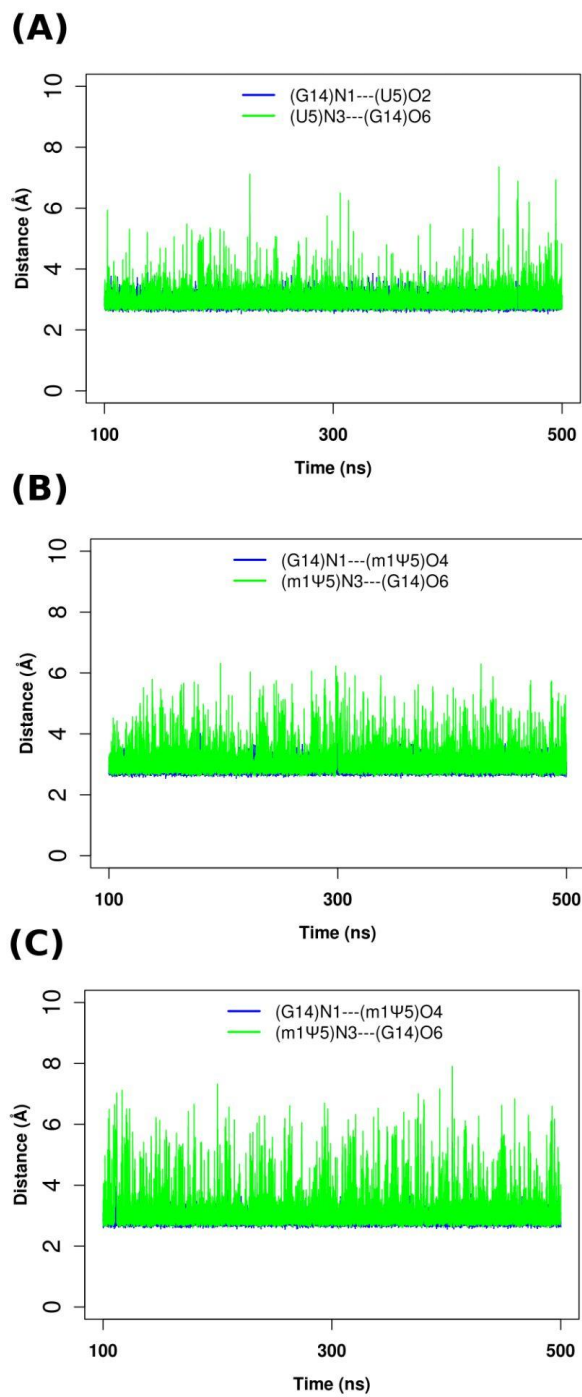

**Figure S1.** Time series of hydrogen bonding distance ( $d$ , i.e. the distance between the hydrogen bond donor and acceptor atoms) for the (A) U-G (B)  $\Psi$ -G and (C)  $m^1\Psi$ -G pairs. For  $m^1\Psi$ -G, the values obtained from simulation replicate 2 are plotted.



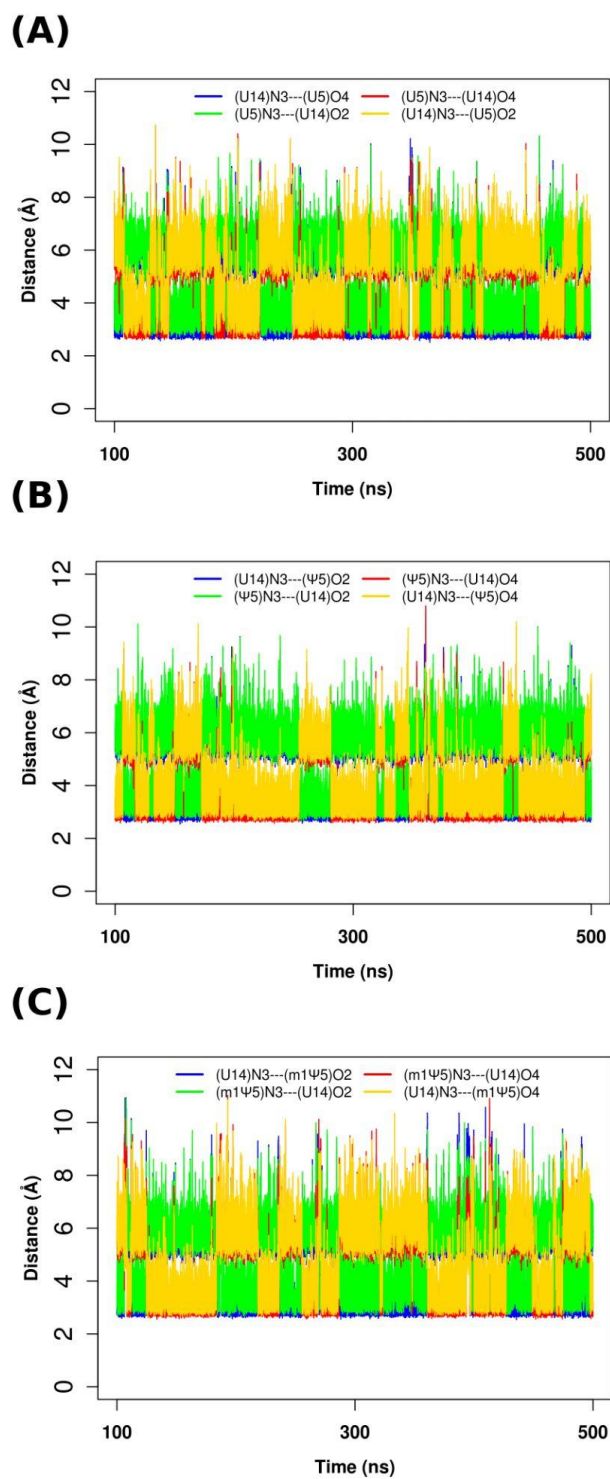

**Figure S2.** Time series of hydrogen bonding distance ( $d$ , i.e. the distance between the hydrogen bond donor and acceptor atoms) for the (A) U-U (B)  $\Psi$ -U and (C)  $m^1\Psi$ -U pairs. For  $m^1\Psi$ -U, the values obtained from simulation replicate 2 are plotted.

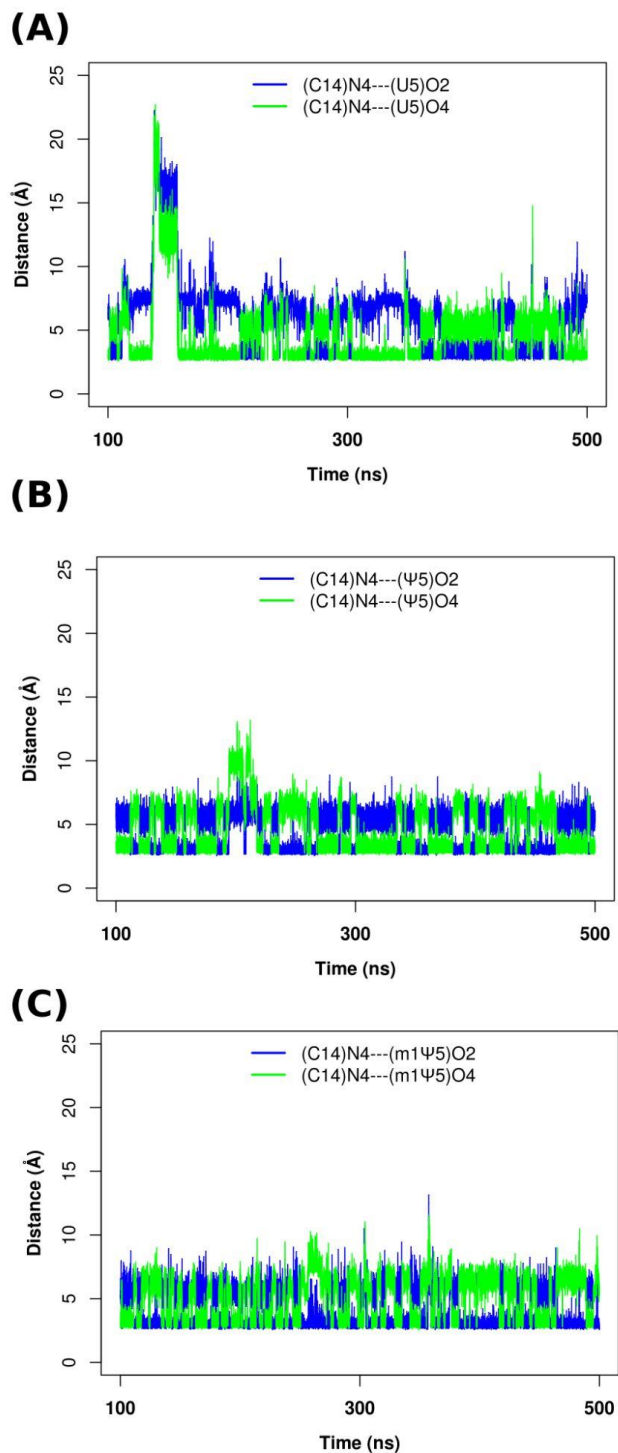

**Figure S3.** Time series of hydrogen bonding distance ( $d$ , i.e. the distance between the hydrogen bond donor and acceptor atoms) for the (A) U-C (B)  $\Psi$ -C and (C)  $m^1\Psi$ -C pairs. For  $m^1\Psi$ -C, the values obtained from simulation replicate 2 are plotted.

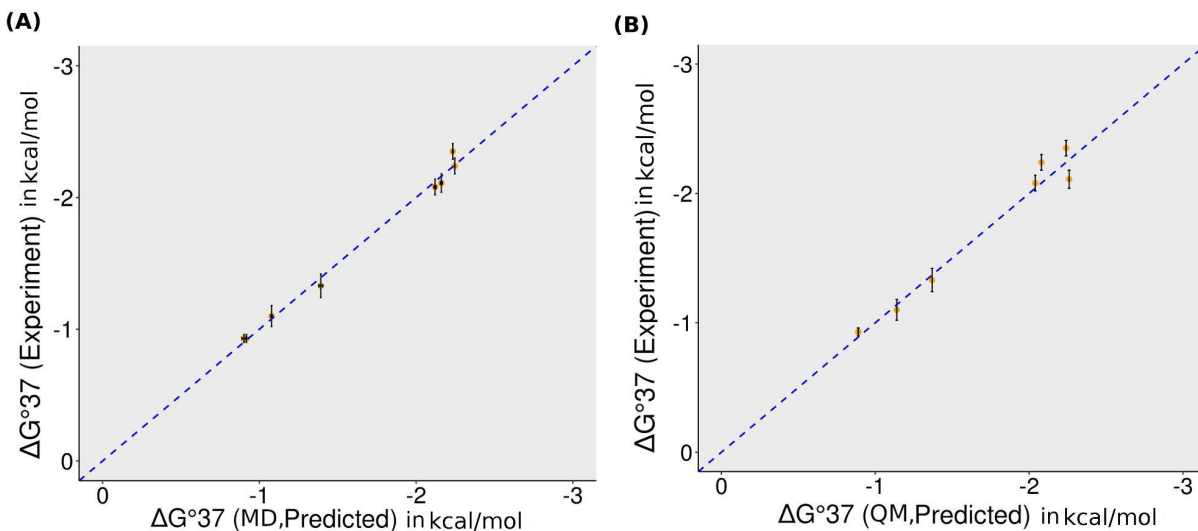

**Figure S4.** Plots of predicted nearest neighbor free energies (kcal/mol) (A)  $\Delta G^{\circ}_{37,MD,Predicted}$  (B)  $\Delta G^{\circ}_{37,QM,Predicted}$  vs experimental nearest neighbor free energies ( $\Delta G^{\circ}_{37,Experiment}$ ) for the U-A pair reported by Xia et al., 1998<sup>3</sup>. The blue dashed line represents the ideal line of regression (with slope =1, and intercept =0).

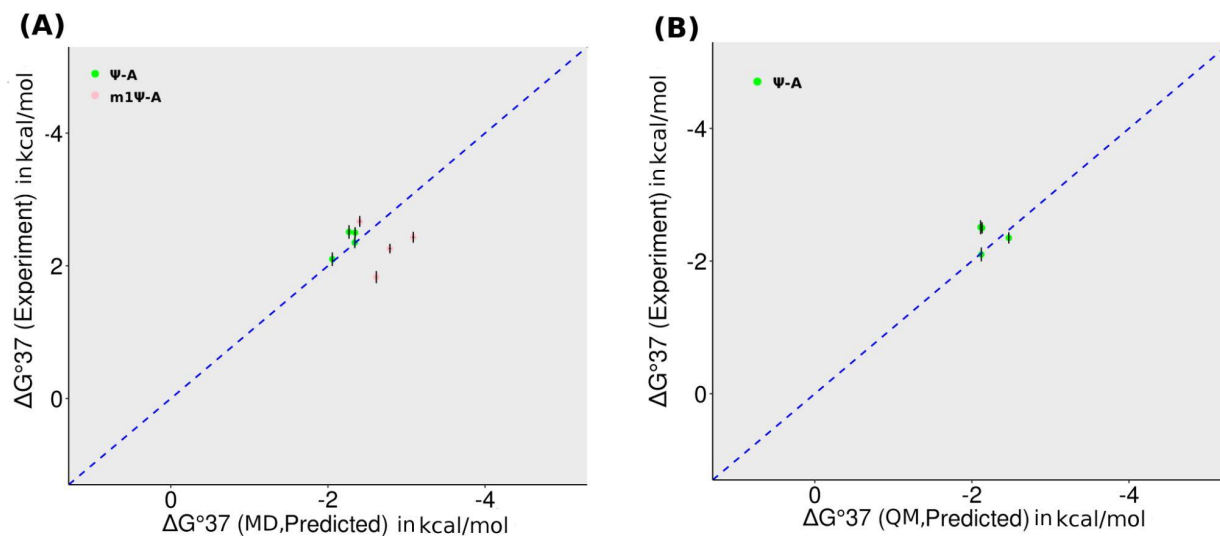

**Figure S5.** Plots of predicted nearest neighbor free energies (kcal/mol) (A)  $\Delta G^{\circ}_{37,MD,Predicted}$  (B)  $\Delta G^{\circ}_{37,QM,Predicted}$  vs experimental nearest neighbor free energies ( $\Delta G^{\circ}_{37,Experiment}$ ) for the  $\Psi$ -A (panels (A) and (B)) and  $m^1\Psi$ -A (only panel (A)) pairs reported by Mauger et al.,<sup>6</sup>. The blue dashed line represents the ideal line of regression (with slope =1, and intercept =0).

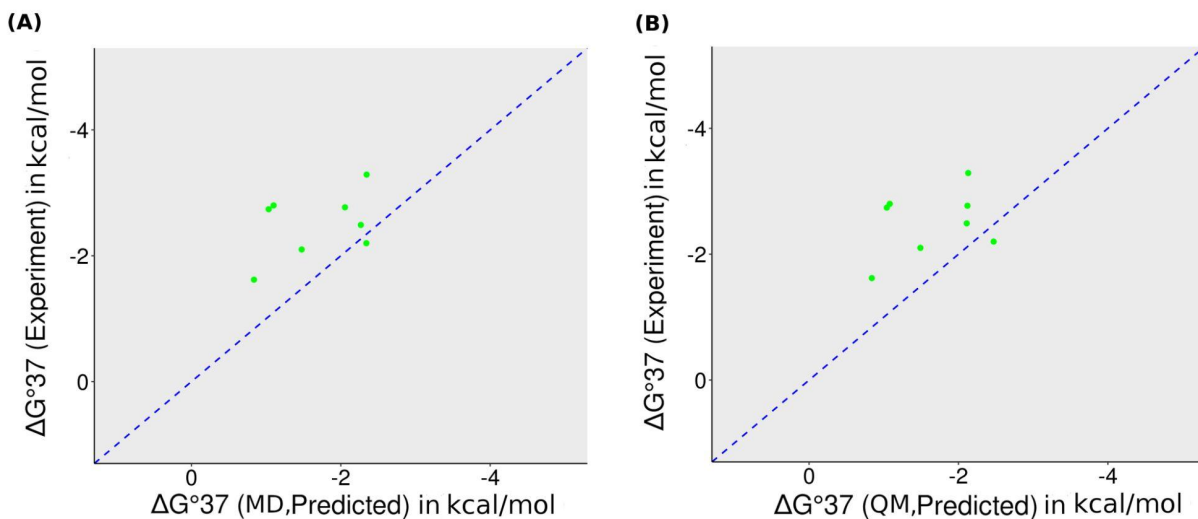

**Figure S6.** Plots of predicted nearest neighbor free energies (kcal/mol) (A)  $\Delta G^{\circ}_{37,MD,Predicted}$  (B)  $\Delta G^{\circ}_{37,QM,Predicted}$  vs experimental nearest neighbor free energies ( $\Delta G^{\circ}_{37,Experiment}$ ) for the Ψ-A pair reported by Hudson et al.<sup>5</sup>. The blue dashed line represents the ideal line of regression (with slope =1, and intercept =0).

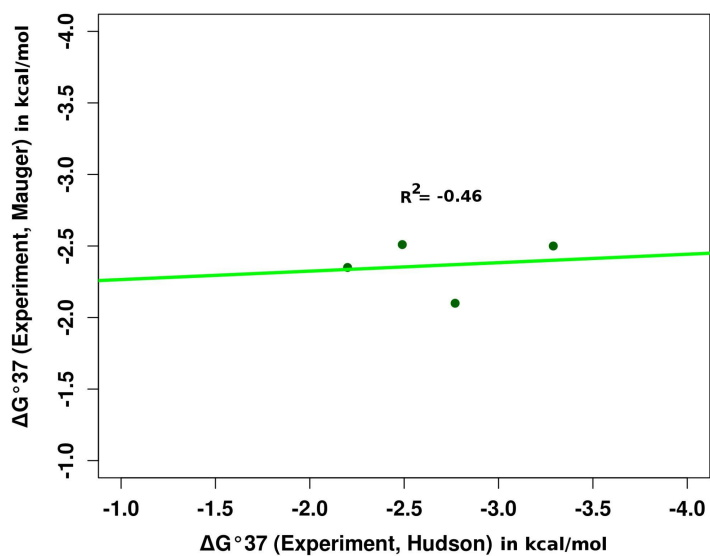

**Figure S7.** Linear regression plot of the experimental NN free energy values for the Ψ-A pair with the values reported by Hudson et al., 2013<sup>5</sup> along the x-axis and those reported by Mauger

et al, <sup>6</sup> along the y-axis. The adjusted R-squared value is indicated above the regression line (green line).

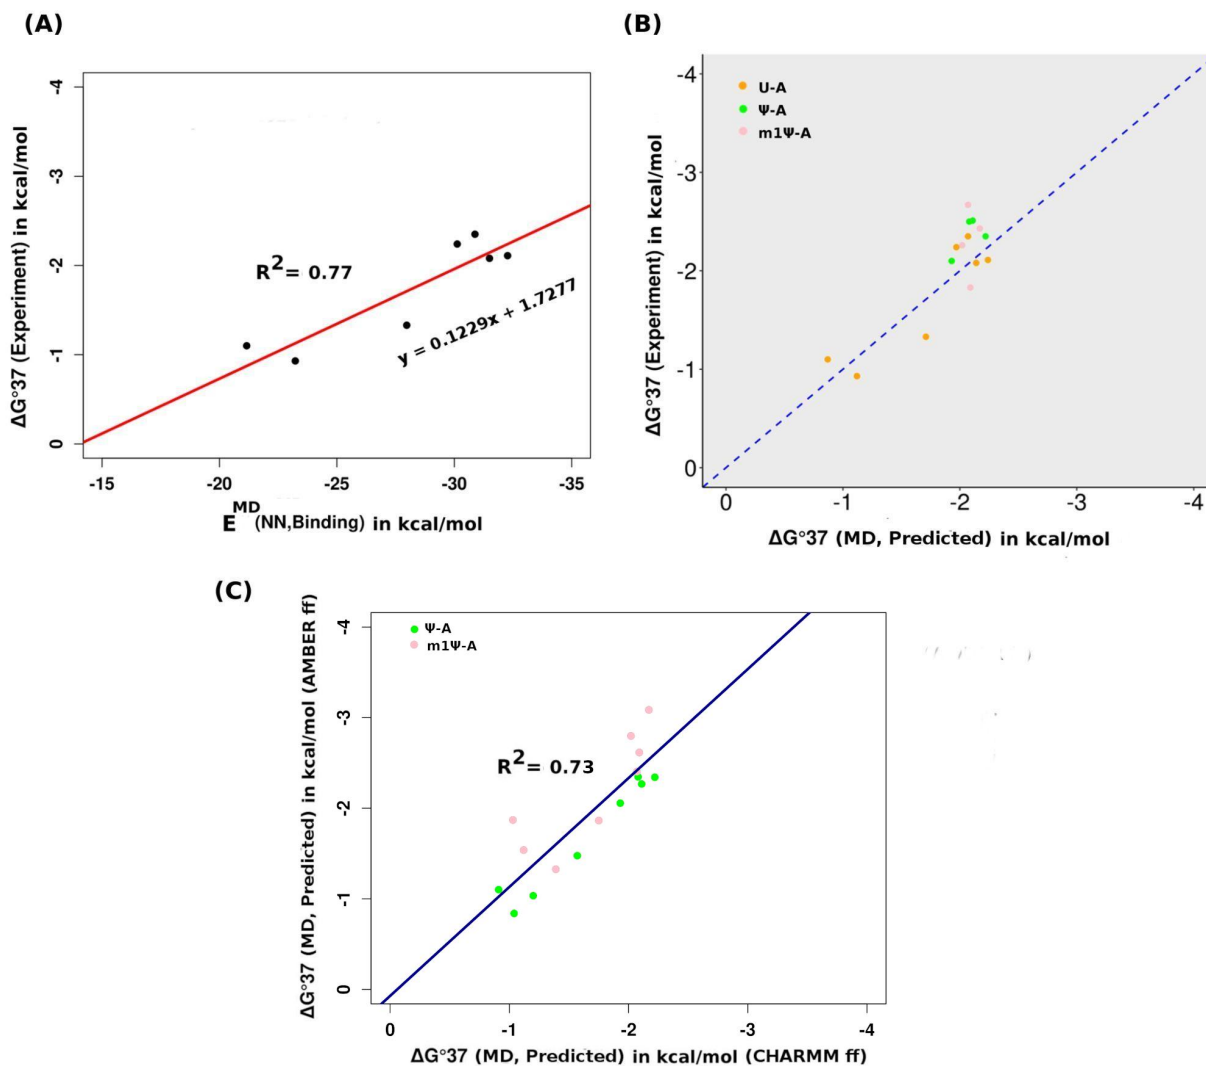

**Figure S8.** (A) Linear regression between experimental nearest neighbor free energies ( $\Delta G_{37, \text{Experiment}}^{\circ}$ ) (kcal/mol) obtained from Xia et al, <sup>3</sup> and the  $E_{\text{NN, binding}}$  (kcal/mol) values obtained from LIE calculations ( $E_{\text{NN, binding}}^{\text{MD}}$ ) corresponding to MD simulations carried out with CHARMM36 force field for the NN pairs containing the U-A pair.  $R^2$  value is indicated above the regression line (solid red line) and the equation of the regression line is also shown; (B) Nearest neighbor free energies (kcal/mol) predicted from MD (with CHARMM36 force field) using LIE analysis ( $\Delta G_{37, \text{MD, Predicted}}^{\circ}$ ) vs experimental nearest neighbor free energies ( $\Delta G_{37, \text{Experiment}}^{\circ}$ )

for the U-A pair obtained from Xia et al,<sup>3</sup> and  $\Psi$ -A and  $m^1\Psi$ -A pairs reported by Mauger et al,<sup>6</sup>. The blue dashed line represents the ideal line of regression (with slope =1, and intercept =0). The  $R^2$  value for the actual regression is 0.776; (C) Linear regression between the predicted NN free energy parameters ( $\Delta G^\circ_{37,MD,Predicted}$ ) for the  $\Psi$ -A and  $m^1\Psi$ -A pairs in this study using CHARMM (CHARMM36) force field and those predicted using AMBER (FF99 variants) force field. The adjusted  $R^2$  value is indicated above the regression line (solid blue line).

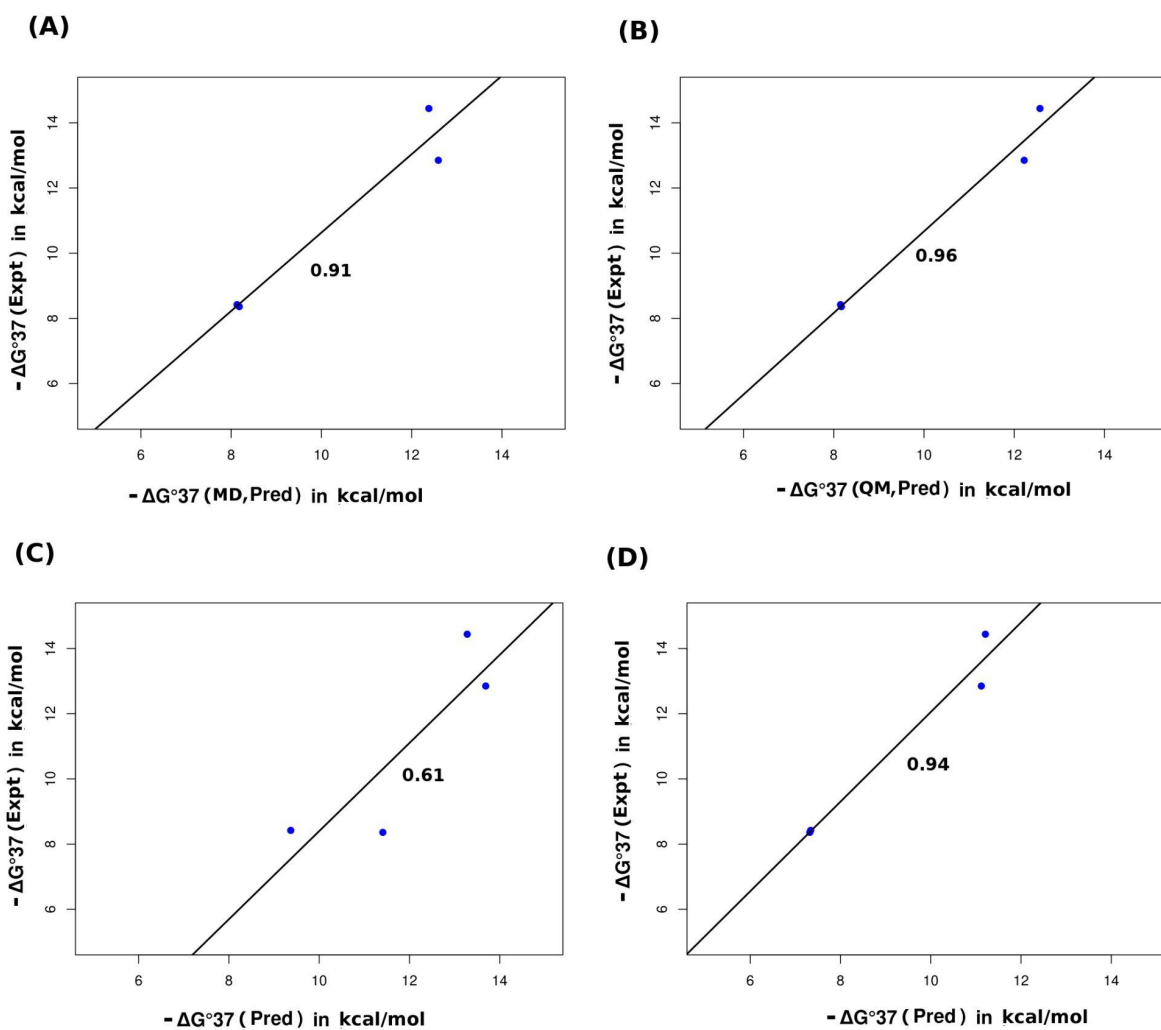

**Figure S9.** Linear regression plots of predicted folding free energies (kcal/mol) vs experimental folding free energies (reported by Kierzek et al., 2014<sup>10</sup>) for the duplexes containing internal  $\Psi$ -A pair studied in this work. (A) Predicted folding free energies using the NN free energy parameters for  $\Psi$ -A predicted from MD (using LIE approach) in this work; (B) predicted folding free energies using the NN free energy parameters for  $\Psi$ -A predicted from QM in this work; (C)

predicted folding free energies using the NN free energy parameters for  $\Psi$ -A reported by Hudson et al., 2013<sup>5</sup> and (D) predicted folding free energies using the NN free energy parameters for  $\Psi$ -A reported by Hopfinger et al., 2020<sup>11</sup>. The adjusted  $R^2$  values are indicated below the regression line (black line).

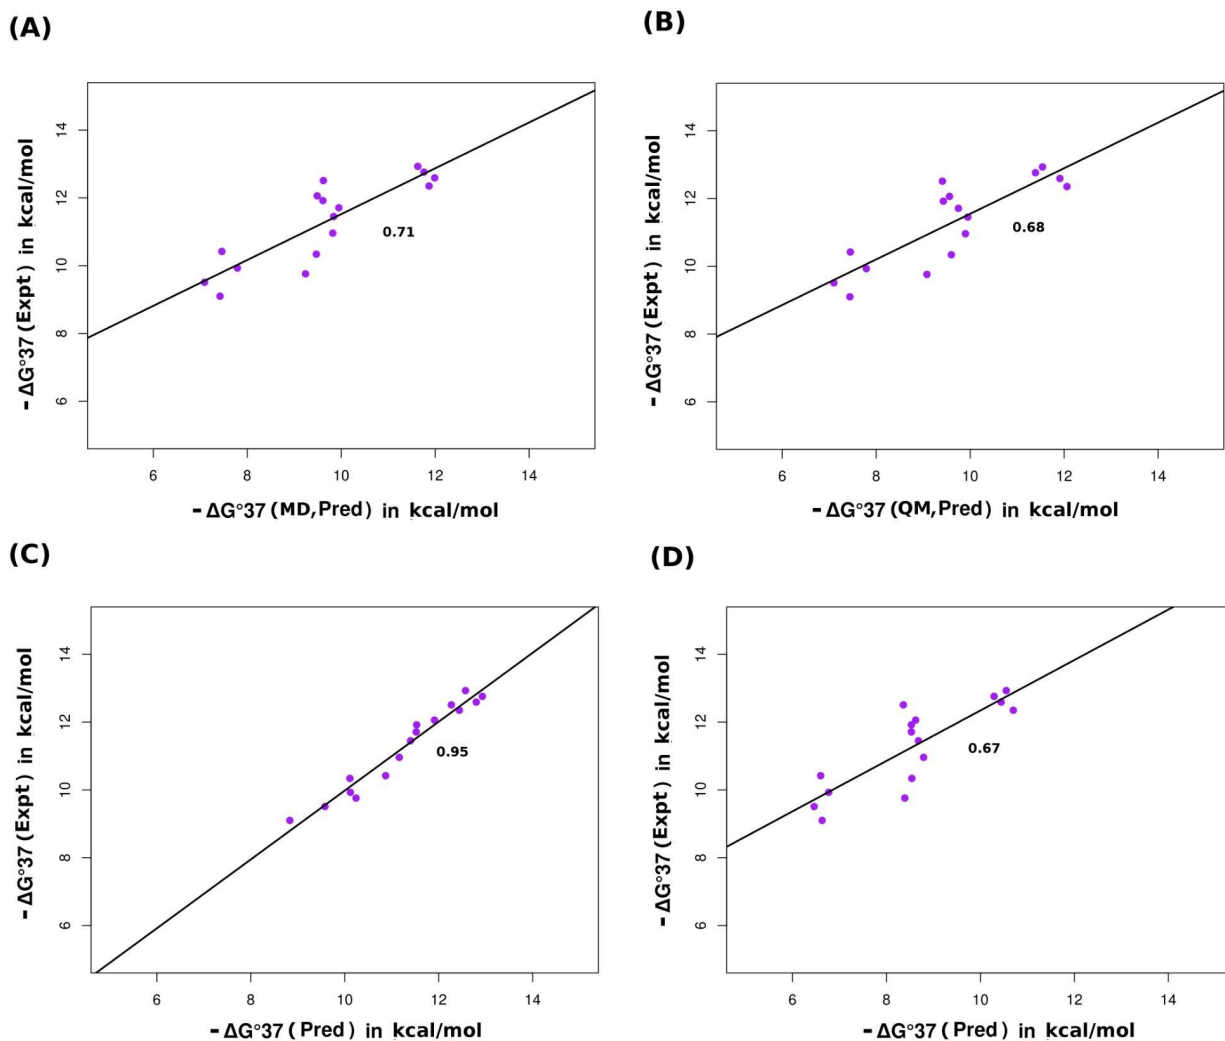

**Figure S10.** Linear regression plots of predicted folding free energies (kcal/mol) vs experimental folding free energies (reported by Hudson et al., 2013<sup>5</sup>) for the duplexes containing internal  $\Psi$ -A pair in their study<sup>5</sup>. (A) Predicted folding free energies using the NN free energy parameters for  $\Psi$ -A predicted from MD (using LIE approach) in this work; (B) predicted folding free energies using the NN free energy parameters for  $\Psi$ -A predicted from QM in this work; (C) predicted folding free energies using the NN free energy parameters for  $\Psi$ -A reported by Hudson et al.,

2013<sup>5</sup> and (D) predicted folding free energies using the NN free energy parameters for  $\Psi$ -A reported by Hopfinger et al., 2020<sup>11</sup>. The adjusted R<sup>2</sup> values are indicated below the regression line (black line).

## REFERENCES

- 1 N. Dutta, I. Deb, J. Sarzynska and A. Lahiri, bioRxiv 2023.03.19.533340; doi: <https://doi.org/10.1101/2023.03.19.533340>, 2023.
- 2 I. Deb, Ł. Popena, J. Sarzyńska, M. Małgowska, A. Lahiri, Z. Gdaniec and R. Kierzek, *Sci. Rep.*, 2019, **9**, 16278.
- 3 T. Xia, J. SantaLucia Jr, M. E. Burkard, R. Kierzek, S. J. Schroeder, X. Jiao, C. Cox and D. H. Turner, *Biochemistry*, 1998, **37**, 14719–14735.
- 4 J. Zuber, S. J. Schroeder, H. Sun, D. H. Turner and D. H. Mathews, *Nucleic Acids Res.*, 2022, **50**, 5251–5262.
- 5 G. A. Hudson, R. J. Bloomingdale and B. M. Znosko, *RNA*, 2013, **19**, 1474–1482.
- 6 D. M. Mauger, B. J. Cabral, V. Presnyak, S. V. Su, D. W. Reid, B. Goodman, K. Link, N. Khatwani, J. Reynders, M. J. Moore and I. J. McFadyen, *Proc. Natl. Acad. Sci. U. S. A.*, 2019, **116**, 24075–24083.
- 7 D. H. Mathews, J. Sabina, M. Zuker and D. H. Turner, *J. Mol. Biol.*, 1999, **288**, 911–940.
- 8 J. L. Chen, A. L. Dishler, S. D. Kennedy, I. Yildirim, B. Liu, D. H. Turner and M. J. Serra, *Biochemistry*, 2012, **51**, 3508–3522.
- 9 F.-C. Chou, W. Kladwang, K. Kappel and R. Das, *Proc. Natl. Acad. Sci. U. S. A.*, 2016, **113**, 8430–8435.
- 10 E. Kierzek, M. Malgowska, J. Lisowiec, D. H. Turner, Z. Gdaniec and R. Kierzek, *Nucleic Acids Res.*, 2014, **42**, 3492–3501.
- 11 M. C. Hopfinger, C. C. Kirkpatrick and B. M. Znosko, *Nucleic Acids Res.*, 2020, **48**, 8901–8913.
